# Host Cell Rap1b mediates cAMP-dependent invasion by *Trypanosoma cruzi*

1 **Gabriel Ferri**<sup>1</sup>, **Martin M. Edreira**<sup>1,2\*</sup>

2 <sup>1</sup>CONICET-Universidad de Buenos Aires, IQUIBICEN, Ciudad de Buenos Aires, Argentina.

3 <sup>2</sup>Laboratorio de Biología Molecular de Trypanosomas, Departamento de Química Biológica,  
4 Facultad de Ciencias Exactas y Naturales, Universidad de Buenos Aires, Ciudad de Buenos Aires,  
5 Argentina.

6 **\* Correspondence:**

7 Martin M. Edreira

8 [mme2@pitt.edu](mailto:mme2@pitt.edu)

9 **Keywords:** *Trypanosoma cruzi*, cAMP signaling, Epac, PKA, Rap1b, MAK/ERK, Host cell  
10 invasion.

## 11 **Abstract**

12 *Trypanosoma cruzi* cAMP-mediated invasion has been long described, however, the detailed  
13 mechanism of action of the pathway activated by this cyclic nucleotide still remains unknown. We  
14 have recently demonstrated a crucial role for Epac in the cAMP-mediated invasion of the host cell. In  
15 this work, we proved that the cAMP/Epac pathway is activated in different cells lines and, by pull-  
16 down experiments designed to identify only the active form of Rap1b (Rap1b-GTP) and invasion  
17 assays using cells transfected with a constitutively active form of Rap1b (Rap1b-G12V), established  
18 the participation of Rap1b as mediator of the pathway. In addition to the activation of this small  
19 GTPase, fluorescence microscopy allowed us to demonstrate the relocalization of Rap1b to the entry  
20 site of the parasite. Moreover, phospho-mimetic and non-phosphorylatable mutants of Rap1b were used  
21 to demonstrate a PKA-dependent antagonistic effect on the pathway, by phosphorylation of Rap1b,  
22 and potentially of Epac. Finally, Western Blot analysis was used to determine the involvement of the  
23 MEK/ERK signalling downstream of cAMP/Epac/Rap1b-mediated invasion.

## 24 **Introduction**

25 As an obligate intracellular parasite, *Trypanosoma cruzi* replicates in the cytoplasm of infected  
26 mammalian host cells. Attachment of trypomastigotes activates several host signalling pathways,  
27 including the elevation of intracellular cAMP levels in the host cell (Ferri and Edreira, 2021). It has  
28 been shown that invasion involves the recruitment and fusion of lysosomes to the entry site (Andrews,  
29 1995), and that cAMP potentiates the Ca<sup>2+</sup>-dependent exocytosis of lysosomes and lysosome-mediated  
30 cell invasion (Rodríguez et al., 1996). Although a transient increase of Ca<sup>2+</sup> and the recruitment of  
31 lysosomes are common features in the invasion of metacyclic trypomastigotes (MTs) and tissue  
32 culture-derived trypomastigotes (TCTs) (Rodriguez et al., 1999; Martins et al., 2011), the signalling  
33 pathways that these parasites promote in the host cell are different. Among them, the activation of  
34 cAMP-mediated signalling by TCTs is a poorly studied process. It has been previously demonstrated  
35 that the pharmacologic intervention of the cAMP pathway was able to modulate parasite invasion  
36 (Rodriguez et al., 1999; Fernandes et al., 2006; Musikant et al., 2017). To determine the specific role  
37 of cAMP main effectors, PKA and Epac, in *T. cruzi* invasion, we used a set of pharmacological tools

38 to selectively activate or inhibit these proteins. Whereas differential activation of PKA had no effect,  
39 a significant increase in invasion was observed in cells treated with a cAMP analogue that exclusively  
40 activates Epac (Musikant et al., 2017). Accordingly, inhibition of Epac by ESI-09 (Enserink et al.,  
41 2002) showed a significant decrease in invasion. Unexpectedly, specific inhibition of PKA also showed  
42 a positive effect on invasion, suggesting a PKA/Epac crosstalk during the process of invasion  
43 (Musikant et al., 2017). In this regard, it has been described that both proteins can be recruited to the  
44 same microdomain through the association with radixin (Gloerich et al., 2010; Hochbaum et al., 2011),  
45 an ERM structural protein that attaches the plasma membrane to the cortical actin cytoskeleton  
46 (McClatchey, 2014). Respectively, confocal studies have shown that ERM proteins are associated with  
47 the invasion site of extracellular amastigotes (EAs), where colocalize with F-actin (Ferreira et al.,  
48 2017). Moreover, a link between radixin and the cAMP/Epac-dependent pathway during TCT invasion  
49 was confirmed by blocking host cell invasion with a permeable version of 15-mer sequence (stearate-  
50 KPRACSYDLLLEHQRP-amide peptide) corresponding to the minimal Epac1 ERM binding domain.  
51 This peptide displaces the Epac protein from its association with radixin and delocalized it from the  
52 microdomain. Under these conditions, the percentage of invasion is similar to that obtained when the  
53 Epac protein is inhibited by ESI-09 (Musikant et al., 2017). Taken together, these results clearly  
54 established a crucial role for Epac in the cAMP-mediated invasion of the host cell. However,  
55 downstream effectors involved in this pathway are still unknown. Epac1 has been involved in PI3K/Akt  
56 and MEK/ERK pathways (Baviera et al., 2010; Gündüz et al., 2019), and members of these pathways,  
57 including Rap1, were localized at late endosomes/lysosomes (Pizon et al., 1994). In cardiomyocytes,  
58 the cAMP/Epac/Rap1 pathway modulates the excitation-contraction mechanism by stimulating  $Ca^{2+}$   
59 release through ryanodine receptors (RyR) (Oestreich et al., 2009). In smooth muscle cells, Rap1  
60 inhibits RhoA activity and promotes  $Ca^{2+}$  desensitization and smooth muscle relaxation (Zieba et al.,  
61 2011). Rap1 activation also induces muscle hyperpolarization by decreasing  $Ca^{2+}$  influx by inducing  
62 the opening of  $Ca^{2+}$ -sensitive  $K^+$  channels, generating a boost in vasodilation (Kosuru and  
63 Chrzanowska, 2020). In addition, Rap1 was shown to modulate mitogen-activated kinases (MAPKs),  
64 like extracellular signal-regulated kinase (ERK1/2), inducing the stimulation or inhibition of these  
65 kinases depending on the cell type. More recently, the role of Rap1 in ERK phosphorylation and  
66 activation in smooth muscle was demonstrated (Li et al., 2018). Ral-GDS, an effector of Rap1,  
67 promotes cardiomyocyte autophagy (Rifki et al., 2013), and the downstream effector of Ral-GDS,  
68 RalB, binds specific subunits of the exocytosis machinery and mediates activation of autophagosome  
69 assembly (Bodemmann et al., 2011).

70 Smooth muscle and heart are the most important target organs for *T. cruzi* infection and persistence  
71 during the chronic phase of Chagas disease. Taking into account that Epac has a critical role in cAMP-  
72 mediated invasion and the regulation of various cAMP-dependent functions in smooth muscle and  
73 heart, possibly modulating the intracellular concentration of  $Ca^{2+}$  through the activation of Rap1 and  
74 the participation of ERK1/2 (Ruiz-Hurtado et al., 2013; Lezoualc'H et al., 2016; Kosuru and  
75 Chrzanowska, 2020), deciphering the detailed functioning of the cAMP/Epac pathway would provide  
76 a deeper insight into the host cell invasion mechanisms mediated by this cyclic nucleotide. In this work,  
77 we investigated the involvement of two known effectors, Rap1b and ERK, as potential mediators in  
78 the cAMP/Epac-dependent invasion by *T. cruzi* and the role of PKA-dependent Rap1b  
79 phosphorylation.

## 80 **Materials and Methods**

### 81 **Cells and parasites**

82 NRK (ATCC® CRL-6509™), VERO (ATCC® CCL-81™) and HELA (ATCC® CCL-2™) cell lines  
83 were cultured in DMEM medium supplemented with Glutamax™ (Gibco), 10% (v/v) FBS (Natocor),

84 100 U/ml penicillin and 0.1 mg/ml streptomycin (Sigma), and maintained at 37°C in a 5% CO<sub>2</sub>  
85 atmosphere. The HL-1 cell line (Claycomb et al., 1998) was cultured in a gelatin/fibronectin matrix (5  
86 µg fibronectin / 0.02% gelatin (m/v)-Sigma) and Claycomb culture medium supplemented with  
87 Glutamax™ (Gibco), 10% (v/v) FBS, 100 U/ml penicillin, 0.1 mg/ml streptomycin and 0.1 mM  
88 norepinephrine (Sigma). Tissue culture-derived trypomastigotes forms (TCT) of *T. cruzi* Y strain were  
89 routinely maintained in VERO cells cultured in DMEM supplemented with 4% FBS and  
90 penicillin/streptomycin. Trypomastigotes were obtained from supernatants of infected VERO cells by  
91 centrifugation.

## 92 **Invasion assay**

93 Cells were grown on glass cover slides with DMEM 10% FBS for 24 hours at 2x10<sup>4</sup> cells/well density  
94 at 37°C, 5% CO<sub>2</sub> and incubated with or without: 37,5 µM of the Epac1 inhibitor ESI-09 (Sigma); 300  
95 µM of 8-Br-cAMP (Biolog); 50 µM of the MEK1/2 inhibitor PD98059. Cells were then washed and  
96 infected with trypomastigotes of the Y strain (moi 100:1) for 2 hours. Parasite were removed and cells  
97 incubated for 48 hs. Cells were fixed, stained with DAPI and infection level determined by  
98 fluorescence microscopy. Percentage of invasion and amastigotes/100 cells were calculated counting  
99 3,000 cells. Infection of non-treated cells was considered as basal infection.

## 100 **Host cell transfection**

101 A transient transfection protocol with polyethyleneimine (PEI) was used (Longo et al., 2013). Briefly,  
102 cells were grown at about 60% confluence and incubated at 37°C in a 5% CO<sub>2</sub>, 95% humidified air  
103 environment. Next day, cells were transfected with pCGN empty vector (EMPTY), pCGN-HA-Rap1b  
104 (HA-Rap1) or HA-Rap1b mutants (G12V, S179A, S179D, or combinations) (kindly provided by Dr  
105 D. Altschuler, University of Pittsburgh, USA) using a ratio of 4:1 DNA:PEI mix in OptiMEM medium  
106 (Gibco). The mixture was kept for 30 min. at room temperature and then added to the cells and  
107 incubated at 37°C and 5% CO<sub>2</sub>. After 24 h, cells were washed with PBS and complete medium (DMEM  
108 or Claycomb 10% FBS) was added. The transfected cells were used at 24h post-transfection.

## 109 **Trypomastigote release assay**

110 HL-1 cells were seeded on a 24-well plate at a concentration of 7000 cells/mL in Claycomb medium  
111 supplemented with 10% FBS. After 24 hours, cells were infected and treated as described above. 72  
112 hours later, medium was replaced with fresh prepared treatments until trypomastigotes were observed  
113 under microscope at six days post infection (pi). Supernatants were transferred to a new plate and a  
114 solution of resazurin sodium salt dye was added (final concentration 0.1 mM). After 3 hours of  
115 incubation, fluorescence was measured with a FLUOstar OPTIMA (BMG LABTECH) microplate  
116 reader at 590 nm (excitation: 570 nm). Baseline corrected values of fluorescence were normalized to  
117 the negative control.

## 118 **GST Pull-down**

119 A total of 1 mL bacteria lysates containing GST or GST-RBD were mixed by rotation with 40 µl 50%  
120 GSH-Sepharose at 4 °C for 1 h. The beads were centrifuged and washed with lysis buffer. Lysates from  
121 HA-Rap1 transfected cells pre-treated for 2h with 8Br-cAMP, infected with trypomastigotes of the Y  
122 strain (Tp Y) or mock infected (Ctrl) were incubated with RBD-glutathione-agarose resin for 1h at  
123 4°C. Resin was washed and eluted with cracking buffer for WB analysis.

## 124 **Western Blot**

125 After electrophoresis, the gel was equilibrated in 25 mM Trizma base, 192 mM L-1 glycine and 20%  
126 v/v methanol pH 8.3. Then, proteins were transferred to previously hydrated with methanol PVDF  
127 membranes (Amersham™ Hybond, GE Healthcare) in a vertical tank (Mini-PROTEAN® Tetra Cell,

128 Bio-Rad). After transfer, membranes were blocked with 20 mM L<sup>-1</sup> Tris-HCl, 500 mM NaCl, 0.05%  
129 Tween and 5% non-fat milk, pH 7.5, incubated with anti-GST (Genscript), anti-p44/42 MAPK  
130 (ERK1/2, Cell Signaling), anti-phospho-p44/42 MAPK (pERK1/2, Cell Signaling) or anti-GAPDH  
131 (Santa Cruz Biotechnology) antibodies. After incubation, membrane was washed and incubated with  
132 rabbit horseradish peroxidase (HRP)-IgGs antibody (Santa Cruz Biotechnology), washed again and  
133 then revealed using 0.88 mg/ml luminol, 0.066 mg/ml p-coumaric acid, 6 mM H<sub>2</sub>O<sub>2</sub>; 100 mM Tris-  
134 HCl, pH 8.8 solution. Chemiluminescence was recorded with the C-DiGit scanner (LI-COR), and  
135 bands intensity were quantified with ImageJ software.

### 136 **ERK phosphorylation**

137 Cells were treated with or without PD98059 for 2h and incubated with trypomastigotes of the Y strain,  
138 treated with 750 μM H<sub>2</sub>O<sub>2</sub> for 5 min or mock infected. Then, cells were lysed and cracking buffer  
139 added for WB analysis.

### 140 **Indirect immunofluorescence assay**

141 Cells were adhered to glass previously treated with 40 μg/ml of poly-D-lysine (Sigma), fixed with  
142 PBS-PFA 4% (Sigma), washed with PBS and incubated with NH<sub>4</sub>Cl for 15 min. Then, were  
143 permeabilized with 0.2% Triton-x100 and incubated with anti-RAP1 antibody (Genscript) at 4°C. After  
144 16 h, washed with PBS, incubated with mouse anti-IgG (H+L) anti-conjugated to Alexa Fluor®594  
145 antibody (Jackson ImmunoResearch), and nuclei stained with DAPI. Finally, glasses were mounted on  
146 slides with FluorSave™ mounting solution (Merk Millipore). Preparations were analysed in a Nikon  
147 Eclipse E600 fluorescence microscope.

## 148 **Results**

### 149 **cAMP/Epac activation as a ubiquitous mechanism of invasion in *T. cruzi***

150 The crucial role of Epac during invasion by *T. cruzi* was recently described in NRK cells (Musikant et  
151 al., 2017). In order to assess the ubiquity of the cAMP/Epac pathway, other cell lines were used in  
152 invasion assays. Similar to what happened in NRK cells (Rodriguez et al., 1999; Musikant et al., 2017),  
153 high levels of cAMP induced by a non-hydrolysable permeable analogue of cAMP, 8-Br-cAMP (8-  
154 Bromoadenosine 3',5'-cyclic monophosphate) (Biolog), positively modulated invasion in both HELA  
155 and HL-1 cells (Figure 1). Consistent with this result, specific pharmacological inhibition of Epac by  
156 ESI-09 (Sigma), resulted in a significant decrease in invasion in both cell lines (Figure 1).

### 157 **Rap1b as a mediator of the cAMP/Epac-dependent invasion**

158 The participation of Rap1b as mediator of the cAMP/Epac-dependent invasion was evaluated by pull-  
159 down experiments using agarose bound GST-RalGDS Rap-binding domain (GST-RBD) designed to  
160 pull down only the active form of Rap1b (Rap1b-GTP). Briefly, cells transfected with HA-Rap1b were  
161 incubated in the presence of DMSO (vehicle), 8-Br-cAMP or trypomastigotes of Y strain of *T. cruzi*  
162 for 2 h. Cells were lysed and lysates used in pull-down experiments. As shown in Figure 2, higher  
163 levels of activated GTP-bound Rap1 were detected in lysates from cells incubated with 8-Br-cAMP  
164 and trypomastigotes, supporting the involvement of Rap1b in cAMP-mediated invasion. In accordance  
165 with these results, HELA and HL-1 cells transfected with a constitutively active form of Rap1b, Rap1b-  
166 G12V, presented a significant increase in invasion, when compared with the control (Figure 3).  
167 Noteworthy, when the invasion-differentiation-release cycle was evaluated in HL-1 cells  
168 overexpressing Rap1b-G12V, trypomastigotes released into the medium reflected the results obtained  
169 for invasion, suggesting the cAMP/Epac/Rap1b pathway played a role in the early steps of the  
170 establishment of infection (Figure 3Biii). In addition to these results that demonstrated that Rap1b-  
171 GTP is required as a mediator of the cAMP/Epac1 pathway during the invasion by *T. cruzi*,  
172 fluorescence microscopy revealed the relocalization of Rap1b, reflected as an increase in the

173 fluorescence intensity of Rap1, to the site of entry of *T. cruzi* (Figure 4), supporting the hypothesis that  
174 Rap1b needs to be activated and properly localized in the entry site.

### 175 **Role of PKA-dependent Rap1b phosphorylation**

176 While the specific activation of PKA had no effect on invasion, an increase in invasion was observed  
177 as a result of PKA inhibition (Musikant et al., 2017). Therefore, under physiological conditions, PKA-  
178 mediated phosphorylation would negatively regulate the cAMP/Epac pathway of invasion. The  
179 inhibition of the Epac-mediated invasion pathway could be achieved, at least, at two different levels:  
180 through direct phosphorylation of Epac or at the level of Rap1, an Epac effector and a known target  
181 for PKA-mediated phosphorylation (Edreira et al., 2009). To evaluate the role of Rap1b  
182 phosphorylation, HELA cells overexpressing phospho-mimetic (S179D) or phospho-deficient  
183 (S179A) Rap1b mutants were infected and trypomastigotes released at day 6 pi were counted using  
184 resazurin method (Rolón et al., 2006). As shown in Figure 5, cells transfected with the phospho-  
185 mimetic Rap1b-S179D mutant presented a decreased invasion with respect to control cells or cells  
186 overexpressing the non-phosphorylatable mutant Rap1b-S179A, supporting a PKA-dependent  
187 antagonistic effect on the pathway. Interestingly, the effect of phosphorylation could be reverted by  
188 transfecting cells with the double mutant G12V/S179D, a constitutive active phospho-mimetic Rap1,  
189 opening the possibility of a two-level regulation of PKA on the Epac/Rap1 pathway.

### 190 **MEK/ERK as a downstream effector of cAMP/Epac-mediated invasion of *T. cruzi***

191 In order to elucidate the involvement of MEK/ERK in the cAMP-dependent invasion, activation of  
192 ERK1/2 was analysed by Western Blot. An increase in ERK1/2 phosphorylation in both NRK and HL-  
193 1 cells was observed during the host cell invasion (Figure 6A). To determine whether the activation of  
194 ERK1/2 modulates the invasion levels, cells pre-treated with the MEK1/2 kinase inhibitor PD98059  
195 were infected with the parasite. In accordance, the inhibition of ERK phosphorylation produced a  
196 significant decrease in invasion (Figure 6B). MEK/ERK could be independently activated or a  
197 downstream effector of Epac/Rap1. The fact that the inhibition of MEK or Epac induced a similar  
198 decrease in invasion, and no additive or synergic effects were observed when both proteins were  
199 simultaneously inhibited (Figure 6C), suggests that MEK/ERK is a downstream effector of  
200 cAMP/Epac1/Rap1b-mediated invasion.

## 201 **Discussion**

202 *T. cruzi* invasion showed to be a complex process just taking into account the different stages of the  
203 parasite with the ability to infect host cells. This complexity is even higher when considering different  
204 DTUs, strains, the repertoire of surface/secreted molecules and the signalling pathways activated in the  
205 host cell (Ferri and Edreira, 2021). Despite being able to infect any nucleated cell, it has been shown  
206 that *T. cruzi* exhibits a certain cellular tropism (Santi-Rocca et al., 2017) and that the signalling  
207 pathways activated in the host cell differ according to the stage of the parasite (Maeda et al., 2012). In  
208 this context, it has been reported that the activation of cAMP-mediated signalling pathways triggers  
209 Ca<sup>2+</sup>-dependent lysosomal exocytosis and promotes host cell invasion by *T. cruzi* (Rodriguez et al.,  
210 1999). The Ca<sup>2+</sup> release from intracellular compartments, such as the endoplasmic reticulum, is  
211 associated with an increase in intracellular levels of cAMP. In mammalian cells, cAMP downstream  
212 effectors, PKA and Epac, are involved in Ca<sup>2+</sup>-activated exocytosis events (Seino and Shibasaki, 2005).  
213 Furthermore, members of these pathways, including Rap1, have been localized to late  
214 endosomes/lysosomes (Pizon et al., 1994), and Epac-mediated activation of Rap1 has been identified  
215 in regulated exocytosis in human sperm (Miro-Moran et al., 2012), insulin secretion (Tengholm and  
216 Gylfe, 2017), and pancreatic amylase release (Sabbatini et al., 2008). It was previously shown that  
217 Epac1-mediated signalling represents the main mechanism for cAMP-mediated invasion by *T. cruzi*  
218 (Musikant et al., 2017). In addition, ERM proteins, which are essential for the function and architecture

219 of the cell cortex by linking the plasma membrane to the underlying actin cytoskeleton (McClatchey,  
220 2014), have been associated with the invasion of EAs (Ferreira et al., 2017). Moreover, in confocal  
221 studies, it was shown that ERM proteins are recruited at the entry site of the parasites where they  
222 colocalize with F-actin, while its depletion inhibits HELA cells invasion (Ferreira et al., 2017).  
223 Remarkably, one of its members, radixin, was identified as a scaffold unit for cAMP effectors in the  
224 spatial regulation of Epac1/Rap1-mediated signaling (Gloerich et al., 2010; Hochbaum et al., 2011). In  
225 this regard, we have previously revealed a link between Epac1 and radixin in the cAMP-mediated  
226 invasion of TCTs, by blocking the invasion of NRK cells with a permeable peptide of 15 amino acids  
227 that binds to the minimal ERM-binding domain of Epac (Musikant et al., 2017). In order to elucidate  
228 the role of cAMP downstream effectors involved in *T. cruzi* invasion, we evaluated the activation of  
229 the cAMP/Epac pathway by TCTs of Y strain in NRK, HELA and HL-1 cell lines. NRK cells are  
230 normal fibroblasts from rat kidney, originally used in the establishment of cAMP as a modulator of  
231 invasion events (Rodriguez et al., 1999) and to demonstrate the participation of Epac1 as the main  
232 effector of this modulation (Musikant et al., 2017). On the other hand, HELA cells are epithelial human  
233 cervix cells that have been widely used in invasion assays (Clemente et al., 2016; Ferreira et al., 2019;  
234 Rodrigues et al., 2019) and HL-1 cells, previously used in invasion assays, as well (Benatar et al.,  
235 2015), are cardiomyocytes from mouse heart, one of the most important target organs in the infection  
236 and persistence of *T. cruzi*. The data obtained showed that the activation of the cAMP/Epac pathway  
237 by TCTs occurs regardless of the origin (rat, mouse, human) or the cell type (kidney, cervix, heart) that  
238 the parasite is invading. In addition, we investigated the role of Rap1b during the cAMP/Epac1-  
239 mediated invasion. Rap1b, a GTPase of the Ras family, is known to integrate Epac- and/or PKA-  
240 dependent events to achieve an efficient cAMP signal transduction (Hochbaum et al., 2008; Jaśkiewicz  
241 et al., 2018; Kosuru and Chrzanowska, 2020). Pull-down assays were used to detect higher levels of  
242 activated GTP-bound Rap1 in lysates from infected cells. Likewise, cells transfected with the  
243 constitutively active form of Rap1b (G12V) were more susceptible to invasion, compared to the  
244 control. Moreover, from fluorescence microscopy assays it was evident the recruitment of Rap1b to  
245 the parasite entry site. Interestingly, when studying PKA participation using a specific inhibitor of this  
246 kinase, it was observed that the invasion levels of TCTs increased compared to the control (Musikant  
247 et al., 2017), suggesting a PKA-dependent antagonist effect. This effect could be mediated by PKA  
248 phosphorylation of the effectors of the cAMP pathway, such as Epac and Rap1b. PKA-dependent  
249 phosphorylation at S179 of Rap1b has long been established (Altschuler and Lapetina, 1993). Our  
250 results support the antagonistic effect of PKA through, at least, Rap1b phosphorylation, since invasion  
251 was affected in cells transfected with phospho-mimetic Rap1b-S179D, with respect to control cells and  
252 cells overexpressing Rap1b-S179A, the non-phosphorylatable version of Rap1b. In line with these  
253 observations, it has been shown that Rap1b phosphorylation destabilizes the association of this protein  
254 with the plasma membrane and promotes Rap1b inactivation (Ntantie et al., 2013; Takahashi et al.,  
255 2013). Here, we demonstrated that the activation of Rap1b is required during the TCT invasion as a  
256 mediator of the cAMP/Epac1 pathway and that Rap1b relocated to the entry site of the parasite.  
257 However, PKA negative effect on invasion was abrogated in the presence of the constitutively active  
258 G12V mutation, suggesting that Rap1b is required in the phosphorylated and inactive form to  
259 completely abolish the cAMP/Epac/Rap1b pathway and, thus, potential regulation of PKA over Epac.

260 It has been described that the MEK/ERK pathway can be activated or inhibited by cAMP (Stork and  
261 Schmitt, 2002). Furthermore, the activation of this pathway participates in the invasion of *T. cruzi* by  
262 way of the interaction of the host cell with parasite surface molecules, such as TS (Chuenkova and  
263 Pereira, 2001), Tc85 (Magdesian et al., 2007) or TSSAII (Cánepa et al., 2012). Also, Rap1 is associated  
264 with the phosphorylation and activation of ERK1/2 in smooth muscle (Li et al., 2018). Accordingly,  
265 our data revealed that TCTs induce ERK1/2 phosphorylation in mammalian cells and ERK1/2

266 activation modulates the invasion of these parasites as a downstream effector of Epac/Rap1-mediated  
267 invasion.

268 Although the transient increase in cytosolic Ca<sup>2+</sup> concentration and lysosome recruitment that occur  
269 during invasion are characteristics shared between MTs and TCTs (Rodriguez et al., 1999; Martins et  
270 al., 2011), the signalling pathways triggered by both forms of parasites in the host cell are different. In  
271 TCT invasion, ERK1/2 activation is a distinctive feature that is mediated by Ca<sup>2+</sup>-dependent lysosomal  
272 exocytosis through the regulation of F-actin and the activation of the focal adhesion kinase (FAK)  
273 (Onofre et al., 2019). During MT invasion, in contrast, PKC promotes Ca<sup>2+</sup> release from inositol 3-  
274 phosphate (IP3)-sensitive compartments through the binding of the surface glycoprotein gp82 to  
275 LAMP-2 receptors (Maeda et al., 2012; Onofre et al., 2021). On the contrary, the activity of PKC is  
276 not required for the invasion of TCTs in NRK cells, since treatment with PKC inhibitors did not affect  
277 the response to Ca<sup>2+</sup> or the reorganization of F-actin, and has no effect on parasite internalization  
278 (Rodriguez et al., 1995). The divergence between the signalling pathways triggered by MTs and TCTs  
279 might be associated with the fact that the internalization of TCT is initiated by an invagination of the  
280 plasma membrane (Woolsey et al., 2003), in a lysosomal exocytosis-dependent process induced by a  
281 membrane injury and the following activation of the PMR mechanism (Fernandes et al., 2011). These  
282 mechanisms lead to changes that take place through the inhibition of the Rho/Rho signaling pathway  
283 by PKA (Woolsey and Burleigh, 2004; Mott et al., 2009). The fact that RhoA promotes actin  
284 polymerization but has a negative effect on EAs internalization during HELA cell invasion (Bonfim-  
285 Melo et al., 2018) and that Rap1b inhibits RhoA/ROCK activity in the muscle smooth tissue  
286 (Lakshmikanthan et al., 2014), suggest the hypothesis that the cAMP/Epac1/Rap1b signalling pathway  
287 could be activated in the first steps of the invasion by *T. cruzi*, promoting Ca<sup>2+</sup>-dependent lysosomal  
288 exocytosis and the reorganization of the cytoskeleton. Once the parasite is inside the cell, a PKA-  
289 mediated inhibition of Epac/Rap1b might be necessary for the parasite retention. In accordance, our  
290 results showed that Rap1b seems to be associated with the plasma membrane at the parasite entry site  
291 where it could be required during the internalization process and PKA had an antagonistic effect,  
292 probably through the phosphorylation of the S179 of Rap1b.

293 In this work, in order to elucidate the mechanisms of cAMP-mediated invasion by *T. cruzi*, it has been  
294 shown that the Epac/Rap1b/ERK pathway is activated during host cell invasion and that it is negatively  
295 regulated by PKA, possibly through the phosphorylation of Epac and/or Rap1b. In addition, a detailed  
296 characterization of effectors involved in *T. cruzi* invasion would provide an attractive set of new  
297 therapeutic targets for the repositioning or the development of new antiparasitic drugs, since there is a  
298 large variety of therapies that target cAMP-mediated signalling (Parnell et al., 2015).

## 299 **Conflict of Interest**

300 *The authors declare that the research was conducted in the absence of any commercial or financial*  
301 *relationships that could be construed as a potential conflict of interest.*

## 302 **Author Contributions**

303 GF and MME conceived, planned, and designed experiments. GF conducted experiments. GF and  
304 MME analysed the data and wrote the manuscript. All authors contributed to the article and approved  
305 the submitted version.

## 306 **Funding**

307 This work was partially supported by the Agencia Nacional de Promoción Científica y Tecnológica  
308 (ANPCyT, Argentina) grant PICT-2015-1713 to MME.

309 **References**

- 310 Altschuler, D., and Lapetina, E. G. (1993). Mutational analysis of the cAMP-dependent protein  
311 kinase-mediated phosphorylation site of Rap1b. *J. Biol. Chem.* 268, 7527–7531. doi:  
312 10.1016/s0021-9258(18)53207-5.
- 313 Andrews, N. W. (1995). Lysosome recruitment during host cell invasion by *Trypanosoma cruzi*.  
314 *Trends Cell Biol* 5, 133–137. doi: S0962892400889655 [pii].
- 315 Baviera, A. M., Zanon, N. M., Navegantes, L. C. C., and Kettelhut, I. C. (2010). Involvement of  
316 cAMP/Epac/PI3K-dependent pathway in the antiproteolytic effect of epinephrine on rat skeletal  
317 muscle. *Mol. Cell. Endocrinol.* 315, 104–112. doi: 10.1016/j.mce.2009.09.028.
- 318 Benatar, A. F., García, G. A., Bua, J., Cerliani, J. P., Postan, M., Tasso, L. M., et al. (2015). Galectin-  
319 1 Prevents Infection and Damage Induced by *Trypanosoma cruzi* on Cardiac Cells. *PLoS Negl.*  
320 *Trop. Dis.* 9, 1–23. doi: 10.1371/journal.pntd.0004148.
- 321 Bodemann, B. O., Orvedahl, A., Cheng, T., Ram, R. R., Ou, Y. H., Formstecher, E., et al. (2011).  
322 RalB and the exocyst mediate the cellular starvation response by direct activation of  
323 autophagosome assembly. *Cell.* doi: 10.1016/j.cell.2010.12.018.
- 324 Bonfim-Melo, A., Ferreira, É. R., and Mortara, R. A. (2018). Rac1/WAVE2 and Cdc42/N-WASP  
325 participation in actin-dependent host cell invasion by extracellular amastigotes of *Trypanosoma*  
326 *cruzi*. *Front. Microbiol.* 9, 1–14. doi: 10.3389/fmicb.2018.00360.
- 327 Cánepa, G. E., Degese, M. S., Budu, A., Garcia, C. R. S., and Buscaglia, C. A. (2012). Involvement  
328 of TSSA (trypomastigote small surface antigen) in *Trypanosoma cruzi* invasion of mammalian  
329 cells 1. *Biochem. J.* 444, 211–218. doi: 10.1042/BJ20120074.
- 330 Chuenkova, M. V., and Pereira, M. A. (2001). The *T. cruzi* trans-sialidase induces PC12 cell  
331 differentiation via MAPK/ERK pathway. *Neuroreport* 12, 3715–3718. doi: 10.1097/00001756-  
332 200112040-00022.
- 333 Claycomb, W. C., Lanson, N. A. J., Stallworth, B. S., Egeland, D. B., Delcarpio, J. B., Bahinski, A.,  
334 et al. (1998). HL-1 cells: a cardiac muscle cell line that contracts and retains phenotypic  
335 characteristics of the adult cardiomyocyte. *Proc. Natl. Acad. Sci. U. S. A.* 95, 2979–2984. doi:  
336 10.1073/pnas.95.6.2979.
- 337 Clemente, T. M., Cortez, C., Novaes, A. da S., and Yoshida, N. (2016). Surface Molecules Released  
338 by *Trypanosoma cruzi* Metacyclic Forms Downregulate Host Cell Invasion. *PLoS Negl. Trop.*  
339 *Dis.* 10, 1–18. doi: 10.1371/journal.pntd.0004883.
- 340 Edreira, M. M., Li, S., Hochbaum, D., Wong, S., Gorfe, A. A., Ribeiro-Neto, F., et al. (2009).  
341 Phosphorylation-induced Conformational Changes in Rap1b. *J. Biol. Chem.* 284, 27480–27486.  
342 doi: 10.1074/jbc.M109.011312.
- 343 Enserink, J. M., Christensen, A. E., De Rooij, J., Van Triest, M., Schwede, F., Genieser, H. G., et al.  
344 (2002). A novel Epac-specific cAMP analogue demonstrates independent regulation of Rap1  
345 and ERK. *Nat. Cell Biol.* 4, 1–6. doi: 10.1038/ncb874.



- 346 Fernandes, A. B., Neira, I., Ferreira, A. T., and Mortara, R. A. (2006). Cell invasion by *Trypanosoma*  
347 *cruzi* amastigotes of distinct infectivities: studies on signaling pathways. *Parasitol Res* 100, 59–  
348 68. doi: 10.1007/s00436-006-0236-6.
- 349 Fernandes, M., Cortez, M., Flannery, A. R., Tam, C., Mortara, R. A., and Andrews, N. W. (2011).  
350 *Trypanosoma cruzi* subverts the sphingomyelinase-mediated plasma membrane repair pathway  
351 for cell invasion. *J. Exp. Med.* 208, 909–921. doi: 10.1084/jem.20102518.
- 352 Ferreira, B. L., Ferreira, É. R., Bonfim-Melo, A., Mortara, R. A., and Bahia, D. (2019). *Trypanosoma*  
353 *cruzi* extracellular amastigotes selectively trigger the PI3K/Akt and Erk pathways during HeLa  
354 cell invasion. *Microbes Infect.* 21, 485–489. doi: 10.1016/j.micinf.2019.06.003.
- 355 Ferreira, É. R., Bonfim-Melo, A., Cordero, E. M., and Mortara, R. A. (2017). ERM proteins play  
356 distinct roles in cell invasion by extracellular amastigotes of *Trypanosoma cruzi*. *Front.*  
357 *Microbiol.* 8, 1–11. doi: 10.3389/fmicb.2017.02230.
- 358 Ferri, G., and Edreira, M. M. (2021). All Roads Lead to Cytosol: *Trypanosoma cruzi* Multi-Strategic  
359 Approach to Invasion. doi: 10.3389/fcimb.2021.634793.
- 360 Gloerich, M., Ponsioen, B., Vliem, M. J., Zhang, Z., Zhao, J., Kooistra, M. R., et al. (2010). Spatial  
361 Regulation of Cyclic AMP-Epac1 Signaling in Cell Adhesion by ERM Proteins. *Mol. Cell. Biol.*  
362 30, 5421–5431. doi: 10.1128/mcb.00463-10.
- 363 Gündüz, D., Troidl, C., Tanislav, C., Rohrbach, S., Hamm, C., and Aslam, M. (2019). Role of  
364 PI3K/Akt and MEK/ERK Signalling in cAMP/Epac-Mediated Endothelial Barrier Stabilisation.  
365 *Front. Physiol.* 10, 1–13. doi: 10.3389/fphys.2019.01387.
- 366 Hochbaum, D., Barila, G., Ribeiro-Neto, F., and Altschuler, D. L. (2011). Radixin assembles cAMP  
367 effectors Epac and PKA into a functional cAMP compartment: role in cAMP-dependent cell  
368 proliferation. *J Biol Chem* 286, 859–866. doi: 10.1074/jbc.M110.163816.
- 369 Hochbaum, D., Hong, K., Barila, G., Ribeiro-Neto, F., and Altschuler, D. L. (2008). Epac, in synergy  
370 with cAMP-dependent protein kinase (PKA), is required for cAMP-mediated mitogenesis. *J*  
371 *Biol Chem* 283, 4464–4468. doi: C700171200 [pii] 10.1074/jbc.C700171200.
- 372 Jaśkiewicz, A., Pajka, B., and Orzechowski, A. (2018). The many faces of rap1 GTPase. *Int. J. Mol.*  
373 *Sci.* 19, 1–20. doi: 10.3390/ijms19102848.
- 374 Kosuru, R., and Chrzanowska, M. (2020). Integration of rap1 and calcium signaling. *Int. J. Mol. Sci.*  
375 21, 1–21. doi: 10.3390/ijms21051616.
- 376 Lakshmikanthan, S., Zieba, B. J., Ge, Z.-D., Momotani, K., Zheng, X., Lund, H., et al. (2014). Rap1b  
377 in Smooth Muscle and Endothelium Is Required for Maintenance of Vascular Tone and Normal  
378 Blood Pressure. *Arterioscler. Thromb. Vasc. Biol.* 34, 1486–1494. doi:  
379 10.1161/ATVBAHA.114.303678.
- 380 Lezoualc’H, F., Fazal, L., Laudette, M., and Conte, C. (2016). Cyclic AMP sensor EPAC proteins  
381 and their role in cardiovascular function and disease. *Circ. Res.* doi:  
382 10.1161/CIRCRESAHA.115.306529.

- 383 Li, Q., Teng, Y., Wang, J., Yu, M., Li, Y., and Zheng, H. (2018). Rap1 promotes proliferation and  
384 migration of vascular smooth muscle cell via the ERK pathway. *Pathol. - Res. Pract.* 214,  
385 1045–1050. doi: 10.1016/j.prp.2018.04.007.
- 386 Longo, P. A., Kavran, J. M., Kim, M. S., and Leahy, D. J. (2013). “Transient mammalian cell  
387 transfection with polyethylenimine (PEI),” in *Methods in Enzymology* (Academic Press Inc.),  
388 227–240. doi: 10.1016/B978-0-12-418687-3.00018-5.
- 389 Maeda, F. Y., Cortez, C., and Yoshida, N. (2012). Cell signaling during *Trypanosoma cruzi* invasion.  
390 *Front Immunol* 3, 361. doi: 10.3389/fimmu.2012.00361.
- 391 Magdesian, M. H., Tonelli, R. R., Fessel, M. R., Silveira, M. S., Schumacher, R. I., Linden, R., et al.  
392 (2007). A conserved domain of the gp85/trans-sialidase family activates host cell extracellular  
393 signal-regulated kinase and facilitates *Trypanosoma cruzi* infection. *Exp. Cell Res.* 313, 210–  
394 218. doi: <https://doi.org/10.1016/j.yexcr.2006.10.008>.
- 395 Martins, R. M., Alves, R. M., Macedo, S., and Yoshida, N. (2011). Starvation and rapamycin  
396 differentially regulate host cell lysosome exocytosis and invasion by *Trypanosoma cruzi*  
397 metacyclic forms. *Cell. Microbiol.* 13, 943–954. doi: 10.1111/j.1462-5822.2011.01590.x.
- 398 McClatchey, A. I. (2014). ERM proteins at a glance. *J. Cell Sci.* 127, 3199–3204. doi:  
399 10.1242/jcs.098343.
- 400 Miro-Moran, A., Jardin, I., Ortega-Ferrusola, C., Salido, G. M., Peña, F. J., Tapia, J. A., et al. (2012).  
401 Identification and function of exchange proteins activated directly by cyclic AMP (Epac) in  
402 mammalian spermatozoa. *PLoS One.* doi: 10.1371/journal.pone.0037713.
- 403 Mott, A., Lenormand, G., Costales, J., Fredberg, J. J., and Burleigh, B. A. (2009). Modulation of host  
404 cell mechanics by *Trypanosoma cruzi*. *J Cell Physiol* 218, 315–322. doi: 10.1002/jcp.21606.
- 405 Musikant, D., Ferri, G., Durante, I. M., Buscaglia, C. A., Altschuler, D. L., and Edreira, M. M.  
406 (2017). Host Epac1 is required for cAMP-mediated invasion by *Trypanosoma cruzi*. *Mol.*  
407 *Biochem. Parasitol.* 211, 67–70. doi: 10.1016/j.molbiopara.2016.10.003.
- 408 Ntantie, E., Gonyo, P., Lorimer, E. L., Hauser, A. D., Schuld, N., McAllister, D., et al. (2013). An  
409 Adenosine-Mediated Signaling Pathway Suppresses Prenylation of the GTPase Rap1B and  
410 Promotes Cell Scattering. *Sci. Signal.* 6. doi: 10.1126/scisignal.2003374.
- 411 Oestreich, E. A., Malik, S., Goonasekera, S. A., Blaxall, B. C., Kelley, G. G., Dirksen, R. T., et al.  
412 (2009). Epac and phospholipase Cε regulate Ca<sup>2+</sup> release in the heart by activation of protein  
413 kinase Cε and calcium-calmodulin kinase II. *J. Biol. Chem.* 284, 1514–1522. doi:  
414 10.1074/jbc.M806994200.
- 415 Onofre, T. S., Rodrigues, J. P. F., Shio, M. T., Macedo, S., Juliano, M. A., and Yoshida, N. (2021).  
416 Interaction of *Trypanosoma cruzi* Gp82 With Host Cell LAMP2 Induces Protein Kinase C  
417 Activation and Promotes Invasion. *Front. Cell. Infect. Microbiol.* 11, 1–16. doi:  
418 10.3389/fcimb.2021.627888.
- 419 Onofre, T. S., Rodrigues, J. P. F., and Yoshida, N. (2019). Depletion of host cell focal adhesion  
420 kinase increases the susceptibility to invasion by *trypanosoma cruzi* metacyclic forms. *Front.*

- 421 *Cell. Infect. Microbiol.* 9, 1–10. doi: 10.3389/fcimb.2019.00231.
- 422 Parnell, E., Palmer, T. M., and Yarwood, S. J. (2015). The future of EPAC-targeted therapies:  
423 agonism versus antagonism. *Trends Pharmacol Sci* 36, 203–214. doi:  
424 10.1016/j.tips.2015.02.003.
- 425 Pizon, V., Desjardins, M., Bucci, C., Parton, R. G., and Zerial, M. (1994). Association of Rap1a and  
426 Rap1b proteins with late endocytic/phagocytic compartments and Rap2a with the Golgi  
427 complex. *J Cell Sci* 107 ( Pt 6, 1661–1670. Available at:  
428 [http://www.ncbi.nlm.nih.gov/entrez/query.fcgi?cmd=Retrieve&db=PubMed&dopt=Citation&list\\_uids=7962206](http://www.ncbi.nlm.nih.gov/entrez/query.fcgi?cmd=Retrieve&db=PubMed&dopt=Citation&list_uids=7962206).  
429
- 430 Rifki, O. F., Bodemann, B. O., Battiprolu, P. K., White, M. A., and Hill, J. A. (2013). RalGDS-  
431 dependent cardiomyocyte autophagy is required for load-induced ventricular hypertrophy. *J Mol*  
432 *Cell Cardiol* 59, 128–138. doi: 10.1016/j.yjmcc.2013.02.015.
- 433 Rodrigues, J. P. F., Souza Onofre, T., Barbosa, B. C., Ferreira, É. R., Bonfim-Melo, A., and Yoshida,  
434 N. (2019). Host cell protein LAMP-2 is the receptor for *Trypanosoma cruzi* surface molecule  
435 gp82 that mediates invasion. *Cell. Microbiol.* 21, 1–11. doi: 10.1111/cmi.13003.
- 436 Rodriguez, A., Martinez, I., Chung, A., Berlot, C. H., and Andrews, N. W. (1999). cAMP regulates  
437 Ca<sup>2+</sup>-dependent exocytosis of lysosomes and lysosome-mediated cell invasion by  
438 trypanosomes. *J Biol Chem* 274, 16754–16759. Available at:  
439 [http://www.ncbi.nlm.nih.gov/entrez/query.fcgi?cmd=Retrieve&db=PubMed&dopt=Citation&list\\_uids=10358016](http://www.ncbi.nlm.nih.gov/entrez/query.fcgi?cmd=Retrieve&db=PubMed&dopt=Citation&list_uids=10358016).  
440
- 441 Rodriguez, A., Rioult, M. G., Ora, A., and Andrews, N. W. (1995). A trypanosome-soluble factor  
442 induces IP<sub>3</sub> formation, intracellular Ca<sup>2+</sup> mobilization and microfilament rearrangement in host  
443 cells. *J. Cell Biol.* 129, 1263–1273. doi: 10.1083/jcb.129.5.1263.
- 444 Rodríguez, A., Samoff, E., Rioult, M. G., Chung, A., and Andrews, N. W. (1996). Host cell invasion  
445 by trypanosomes requires lysosomes and microtubule/kinesin-mediated transport. *J. Cell Biol.*  
446 134, 349–362. doi: 10.1083/jcb.134.2.349.
- 447 Rolón, M., Vega, C., Escario, J. A., and Gómez-Barrio, A. (2006). Development of resazurin  
448 microtiter assay for drug sensibility testing of *Trypanosoma cruzi* epimastigotes. *Parasitol. Res.*  
449 doi: 10.1007/s00436-006-0126-y.
- 450 Ruiz-Hurtado, G., Morel, E., Domínguez-Rodríguez, A., Llach, A., Lezoualc’h, F., Benitah, J. P., et  
451 al. (2013). Epac in cardiac calcium signaling. *J. Mol. Cell. Cardiol.* doi:  
452 10.1016/j.yjmcc.2012.11.021.
- 453 Sabbatini, M. E., Chen, X., Ernst, S. A., and Williams, J. A. (2008). Rap1 activation plays a  
454 regulatory role in pancreatic amylase secretion. *J Biol Chem* 283, 23884–23894. doi:  
455 M800754200 [pii] 10.1074/jbc.M800754200.
- 456 Santi-Rocca, J., Fernandez-Cortes, F., Chillón-Marinás, C., González-Rubio, M. L., Martín, D.,  
457 Gironès, N., et al. (2017). A multi-parametric analysis of *Trypanosoma cruzi* infection:  
458 Common pathophysiologic patterns beyond extreme heterogeneity of host responses. *Sci. Rep.*  
459 doi: 10.1038/s41598-017-08086-8.

- 460 Seino, S., and Shibasaki, T. (2005). PKA-dependent and PKA-independent pathways for cAMP-  
461 regulated exocytosis. *Physiol Rev* 85, 1303–1342. doi: 85/4/1303 [pii]  
462 10.1152/physrev.00001.2005.
- 463 Stork, P. J. ., and Schmitt, J. M. (2002). Crosstalk between cAMP and MAP kinase signaling in the  
464 regulation of cell proliferation. *Trends Cell Biol* 12, 258–266. doi: S0962892402022948 [pii].
- 465 Takahashi, M., Dillon, T. J., Liu, C., Kariya, Y., Wang, Z., and Stork, P. J. S. (2013). Protein kinase  
466 a-dependent phosphorylation of Rap1 regulates its membrane localization and cell migration. *J.*  
467 *Biol. Chem.* 288, 27712–27723. doi: 10.1074/jbc.M113.466904.
- 468 Tengholm, A., and Gylfe, E. (2017). cAMP signalling in insulin and glucagon secretion. *Diabetes,*  
469 *Obes. Metab.* doi: 10.1111/dom.12993.
- 470 Woolsey, A. M., and Burleigh, B. A. (2004). Host cell actin polymerization is required for cellular  
471 retention of *Trypanosoma cruzi* and early association with endosomal/lysosomal compartments.  
472 *Cell Microbiol* 6, 829–838. doi: 10.1111/j.1462-5822.2004.00405.x.
- 473 Woolsey, A. M., Sunwoo, L., Petersen, C. A., Brachmann, S. M., Cantley, L. C., and Burleigh, B. A.  
474 (2003). Novel PI 3-kinase-dependent mechanisms of trypanosome invasion and vacuole  
475 maturation. *J. Cell Sci.* 116, 3611–3622. doi: 10.1242/jcs.00666.
- 476 Zieba, B. J., Artamonov, M. V., Jin, L., Momotani, K., Ho, R., Franke, A. S., et al. (2011). The  
477 cAMP-responsive Rap1 Guanine Nucleotide Exchange Factor, Epac, Induces Smooth Muscle  
478 Relaxation by Down-regulation of RhoA Activity. *J. Biol. Chem.* 286, 16681–16692. doi:  
479 10.1074/jbc.M110.205062.

480

## 481 **Figure Captions**

482 **Figure 1:** cAMP/Epac pathway is required for *T. cruzi* invasion in different cell lines. Pre-treated NRK,  
483 HELA or HL-1 cells (30 min at 300  $\mu$ M of 8-Br-cAMP or 37.5  $\mu$ M of ESI-09) were infected with  
484 trypomastigotes from *T. cruzi* Y strain (100:1 parasite to cell ratio for 2 h). 48 hs post-infection cells  
485 were fixed, stained with DAPI and percentage of invasion determined by fluorescence microscopy.  
486 Infection of untreated cells was considered as basal infection. Results are expressed as mean  $\pm$  SD (n  
487  $\geq$  3). \*\*\*\* p<0.0001, \*\*\* p <0.001, \*\* p <0.01; ANOVA and Dunnett's post-test.

488 **Figure 2:** Rap1b pull-down assays. **A)** HA-Rap1 transfected NRK, HELA or HL-1 cells were  
489 incubated for 2 h with 8-Br-cAMP, infected with trypomastigotes from *T. cruzi* Y strain or mock  
490 infected (DMSO). Then, cells were lysed and pull-down assay with glutathione-agarose resin  
491 performed for 1 h at 4°C. Resin was washed and eluted with cracking buffer for WB analysis. **B)** Bands  
492 were quantified and normalized against the input using ImageJ cell software. Results are expressed as  
493 mean  $\pm$  SD (n $\geq$ 3). \* p<0.05, \*\* p <0.005, One-way ANOVA – Dunnett's multiple comparison test.

494 **Figure 3:** Invasion assays. Rap1 transfected Hela and HL-1 cells were infected with trypomastigotes  
495 from *T. cruzi* Y strain (100:1 parasite to cell ratio for 2 h). 48 hs post-infection cells were fixed, stained  
496 with DAPI and percentage of invasion determined by fluorescence microscopy. Infection of untreated  
497 cells was considered as basal infection. Results are expressed as mean  $\pm$  SD (n  $\geq$  3), \*\* p <0.01, \* p  
498 <0.1; ANOVA and Dunnett's post-test. In the case of the trypomastigote release assay, HL-1 cells were  
499 infected and treated as described above. 72 hours later, medium was replaced with fresh prepared  
500 treatments until trypomastigotes were observed under microscope at six days post infection (pi).

501 Supernatants were transferred to a new plate and quantification of trypomastigotes was performed with  
502 resazurin method. Results are expressed as mean  $\pm$  SD ( $n \geq 3$ ). \*\*\*\*  $p < 0.0001$ , t student test.

503 **Figure 4:** Immunofluorescence of HL-1 cells were infected for 5 to 15 min with (Tp Y)  
504 trypomastigotes from *T. cruzi* Y strain or mock infected (Control) and then fixed and incubated with  
505 primary antibody against Rap1 protein and a secondary antibody conjugated to Alexa594. Photos were  
506 taken with a fluorescence microscope.

507 **Figure 5:** PKA-dependent phosphorylation effect on invasion. Transfected HL-1 cells were infected  
508 and treated as described above. 72 hours later, medium was replaced with fresh prepared treatments  
509 until trypomastigotes were observed under microscope at six days post infection (pi). Supernatants  
510 were transferred to a new plate and quantification of trypomastigotes was performed with resazurin  
511 method. Results are expressed as mean  $\pm$  SD ( $n \geq 3$ ), \*\*\*  $p < 0.001$ , \*\*  $p < 0.01$ ; ANOVA and Dunnett's  
512 post-test.

513 **Figure 6:** ERK phosphorylation. **A)** NRK or HL-1 cells were incubated for 2 h with trypomastigotes  
514 from *T. cruzi* Y strain (Tp Y), treated with 750  $\mu$ M H<sub>2</sub>O<sub>2</sub> for 5 min (positive control) or mock infected  
515 (Control). Then, cells were lysed and cracking buffer added for WB analysis. **B)** and **C)** Invasion assay.  
516 Pretreated HELA cells were infected with trypomastigotes from *T. cruzi* Y strain (100:1 parasite to cell  
517 ratio for 2 h). 48 hs post-infection cells were fixed, stained with DAPI and percentage of invasion  
518 determined by fluorescence microscopy. Infection of untreated cells was considered as basal infection.  
519 Results are expressed as mean  $\pm$  SD ( $n \geq 3$ ) \*\*\*  $p < 0.001$ , \*\*  $p < 0.01$ ; ANOVA and Dunnett's post-  
520 test.

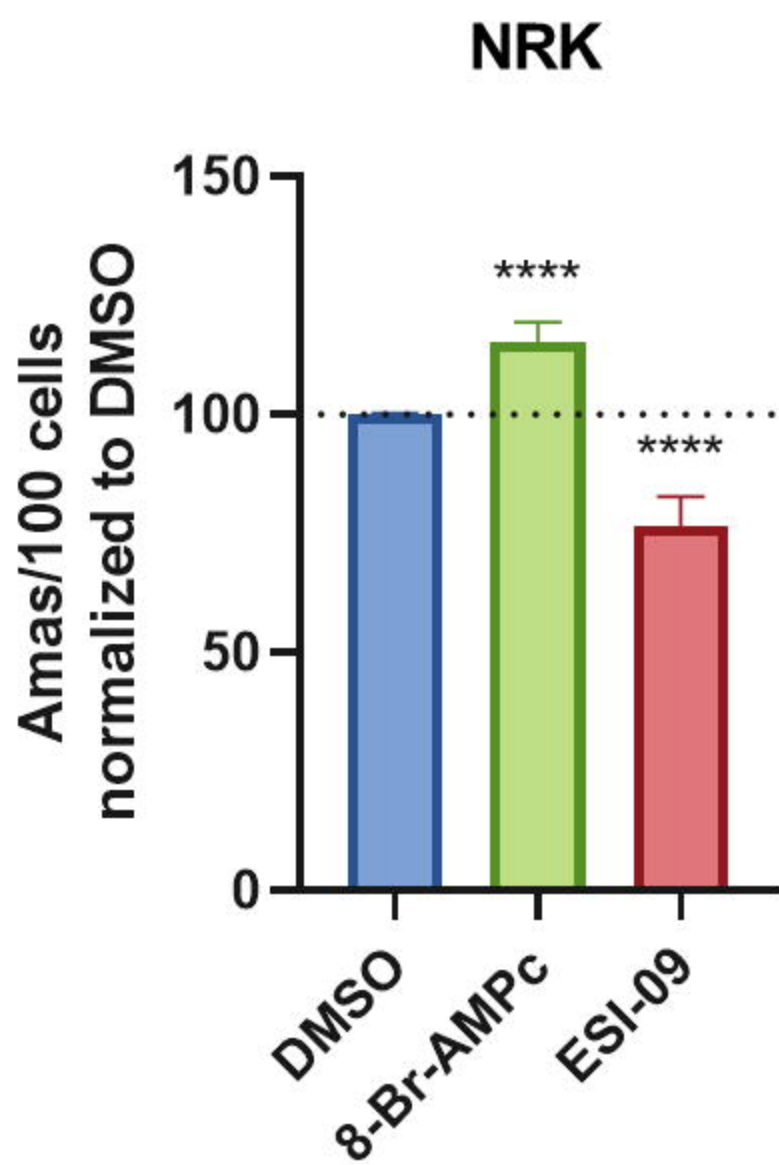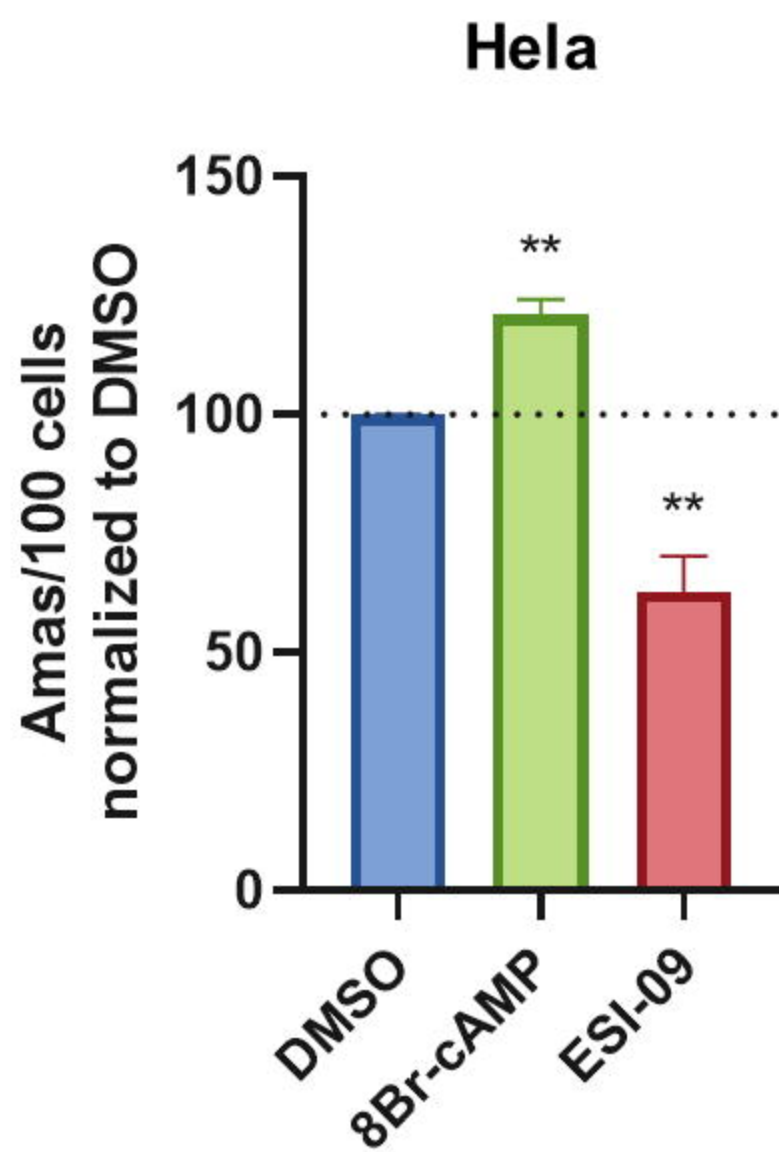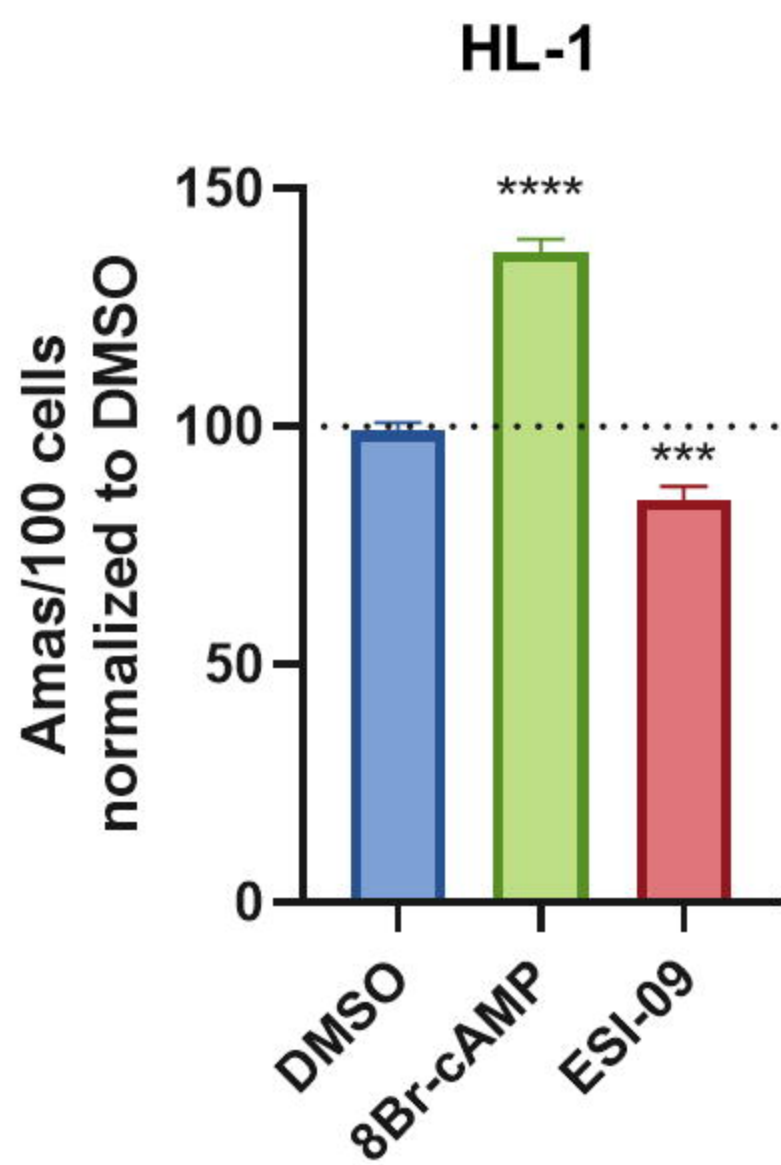

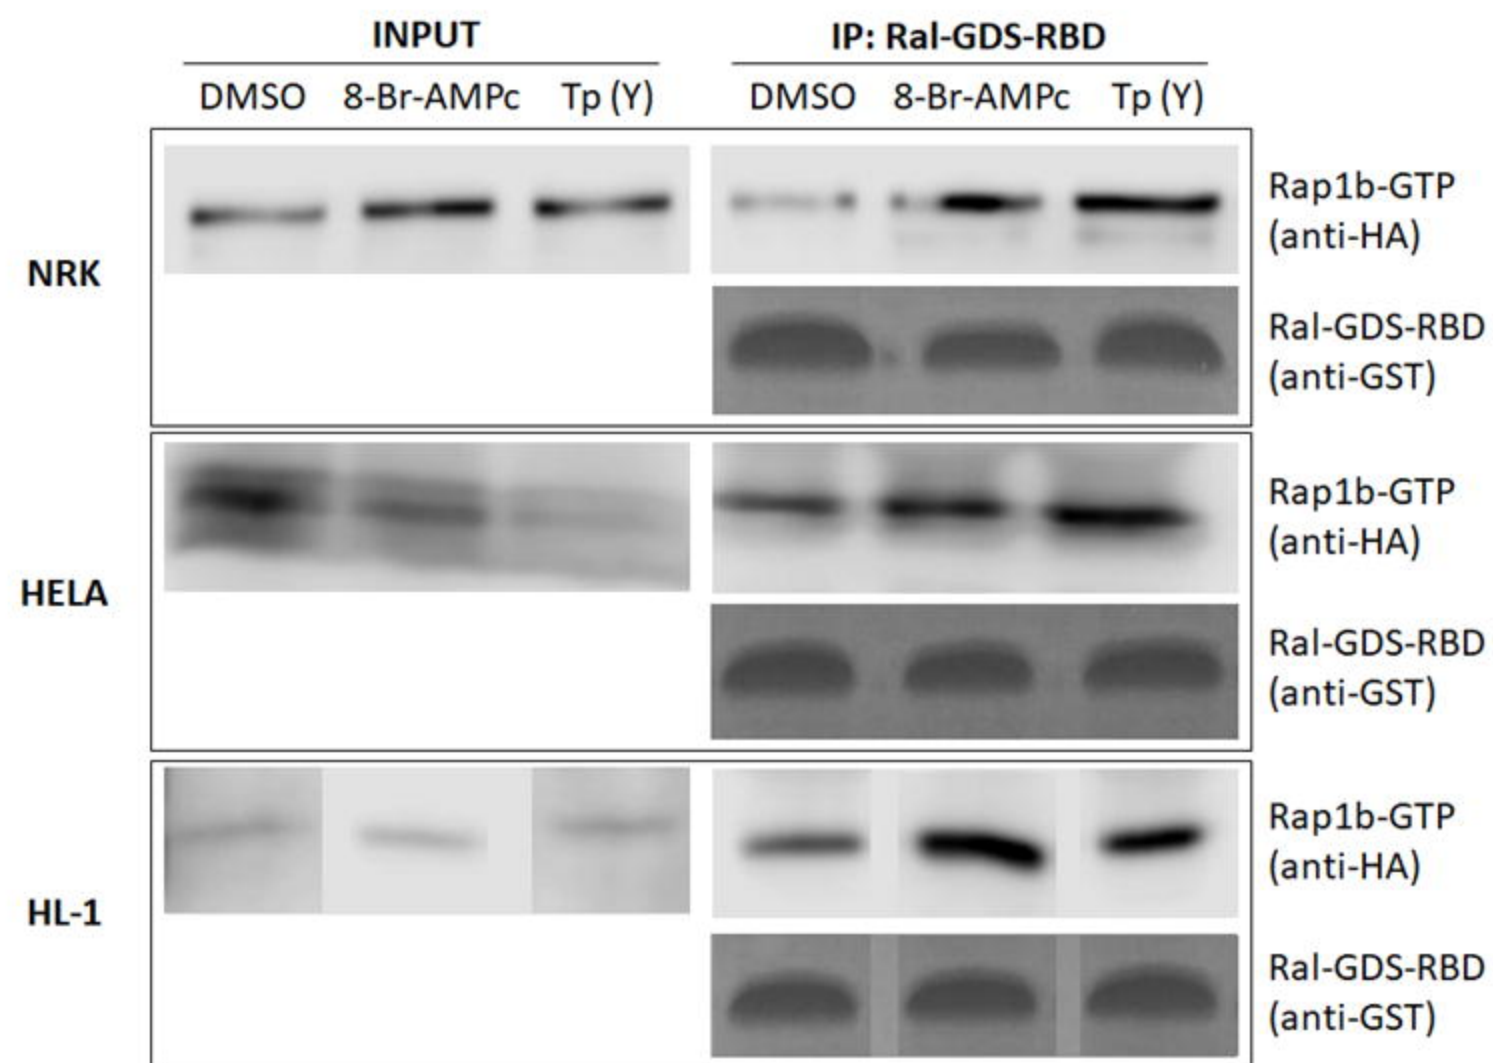

**A**

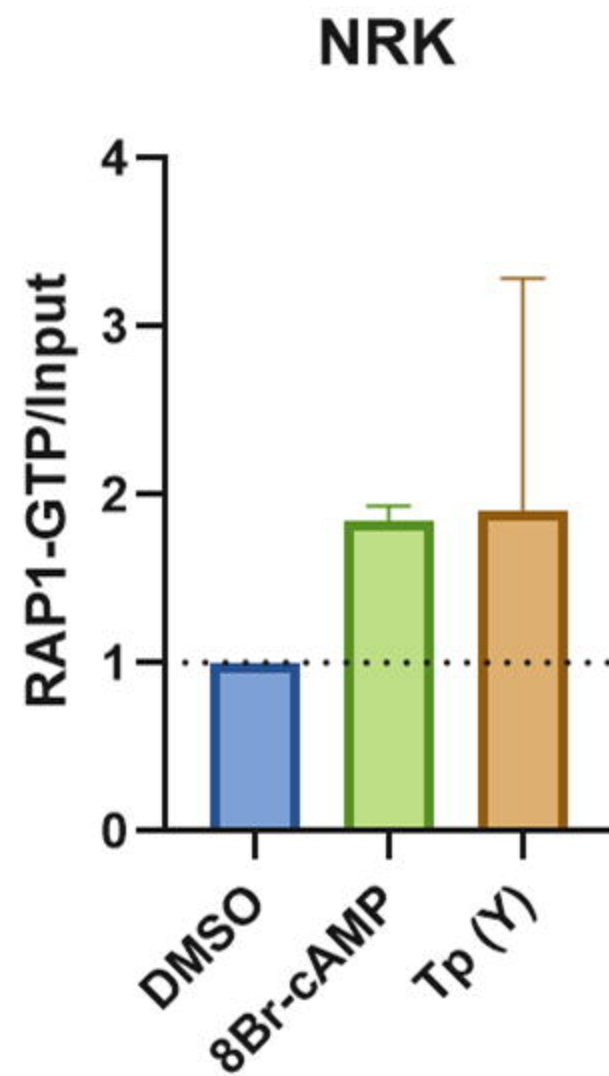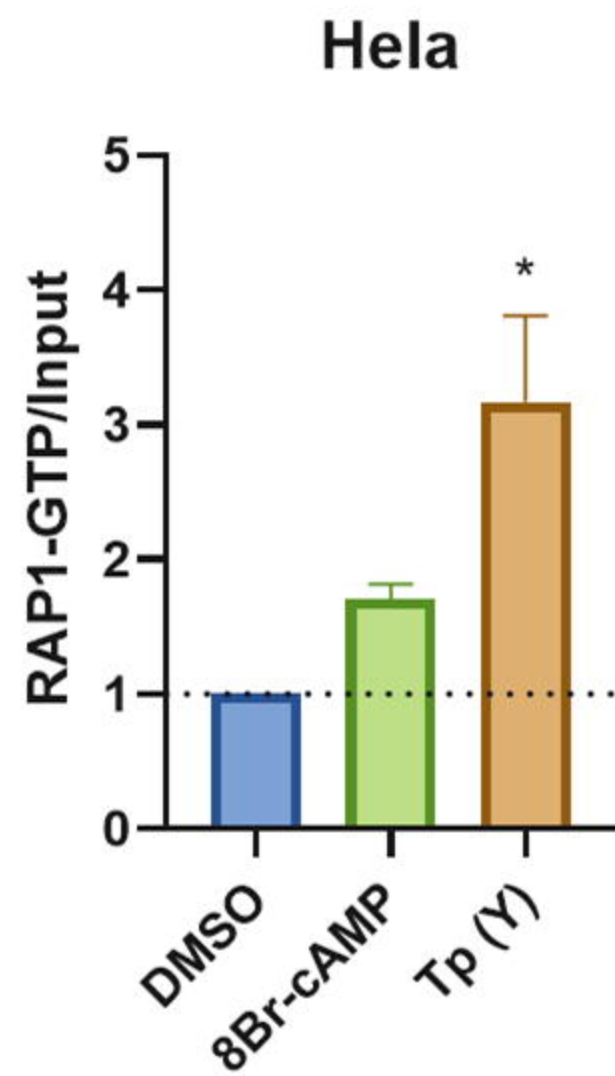

**B**

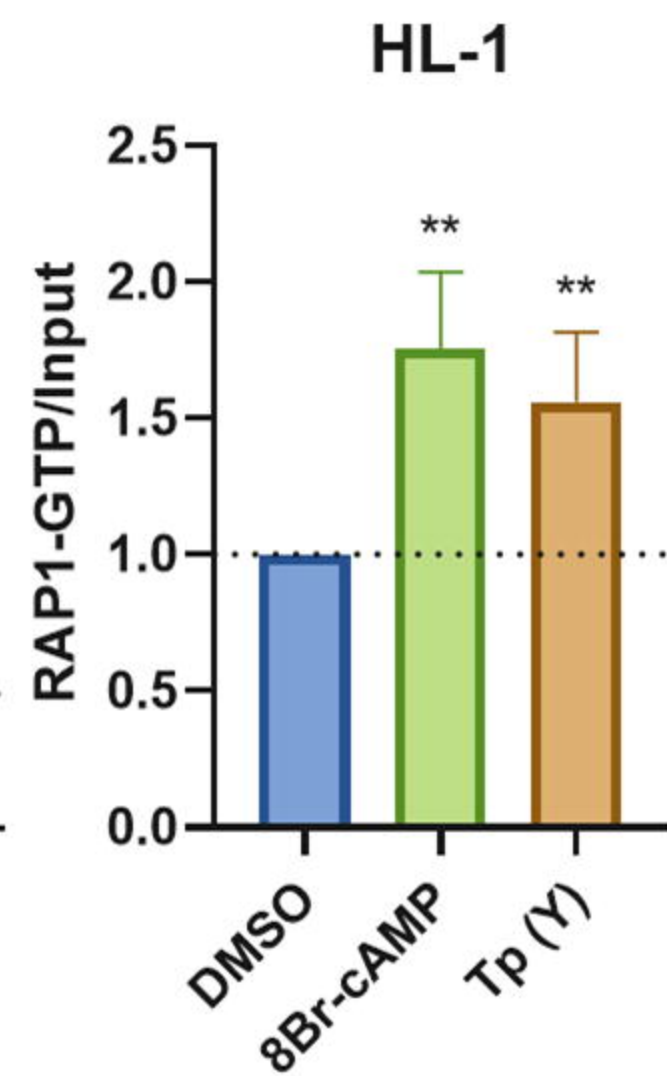

## Hela

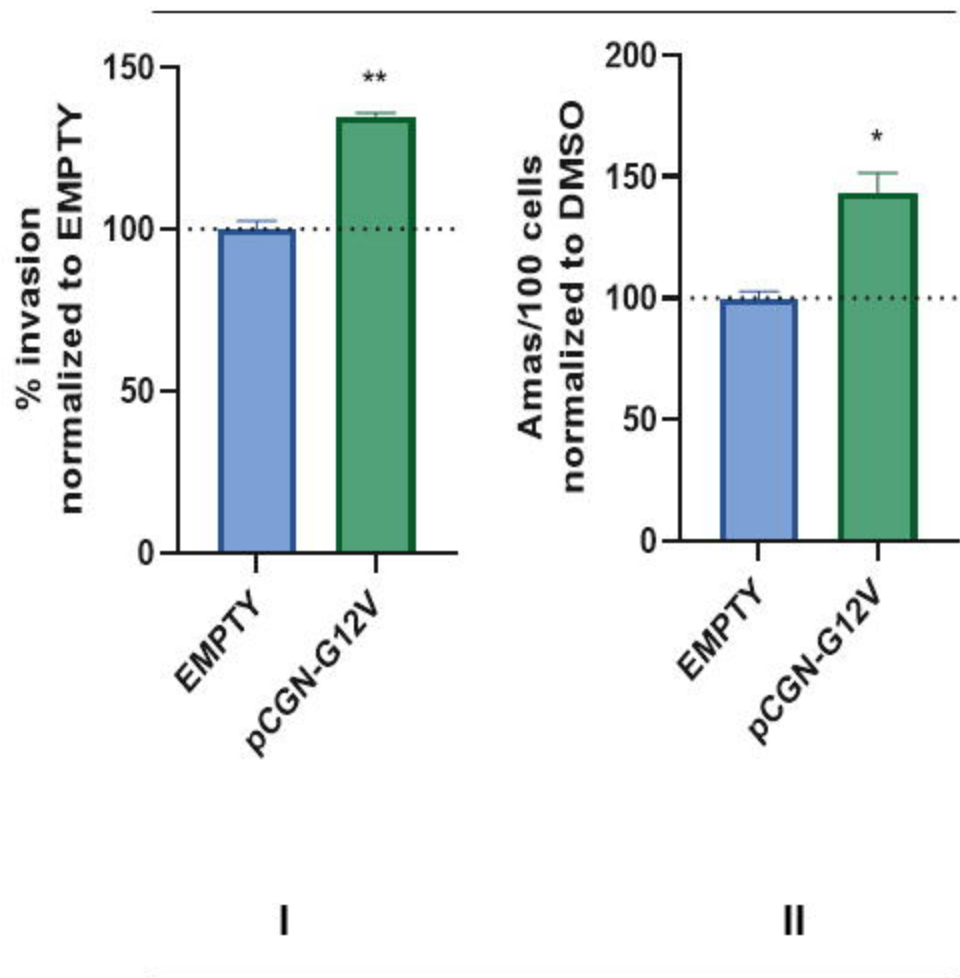

**A**

## HL-1

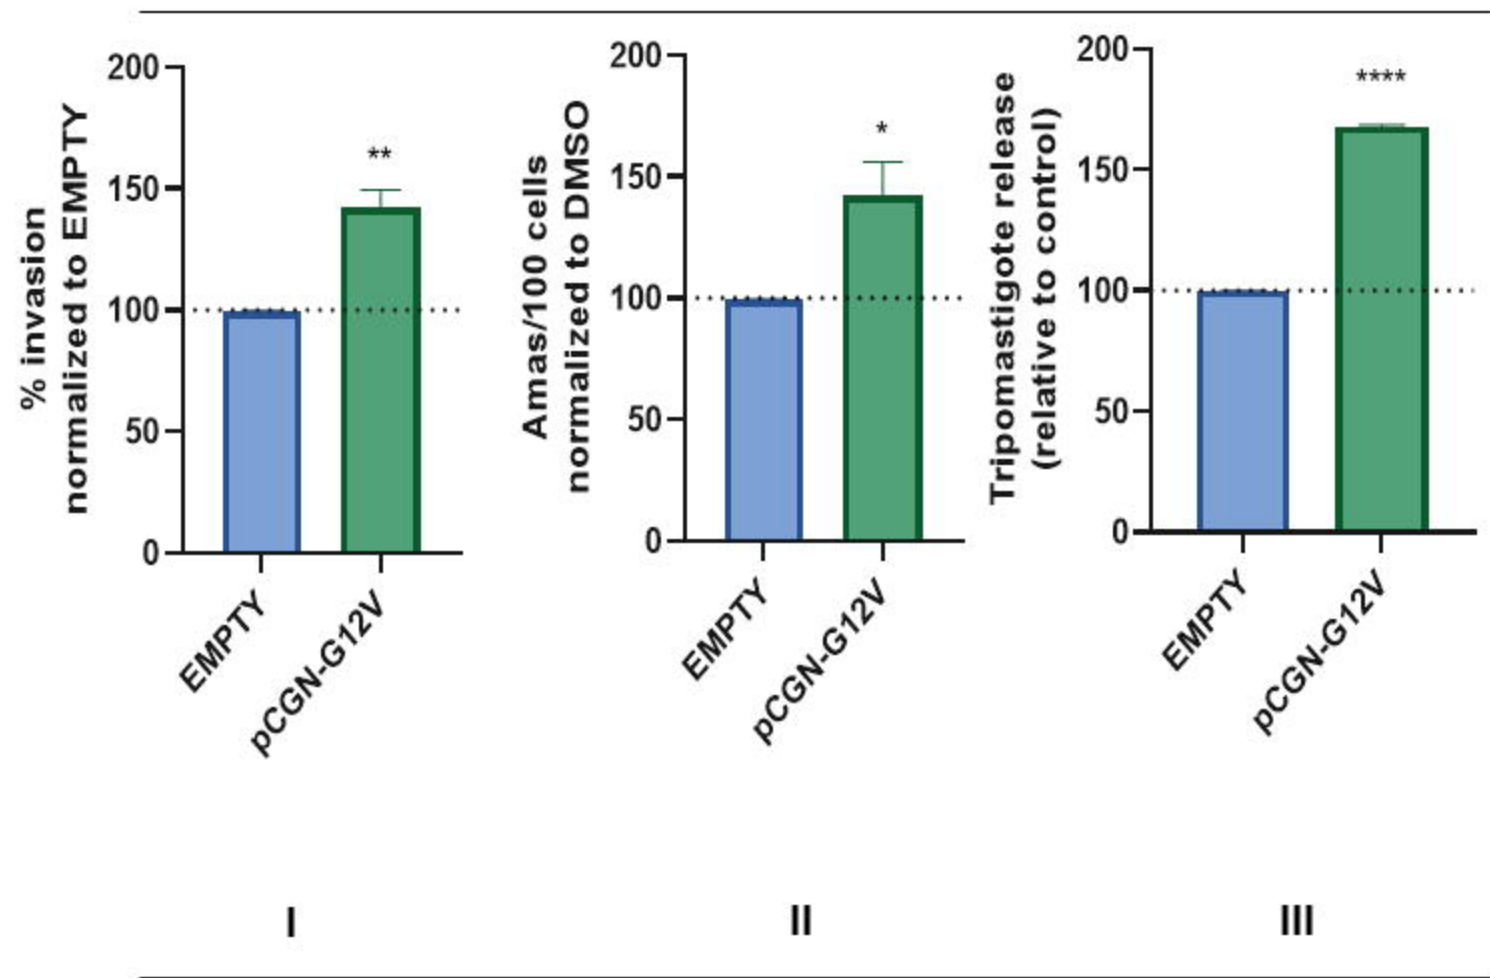

**B**



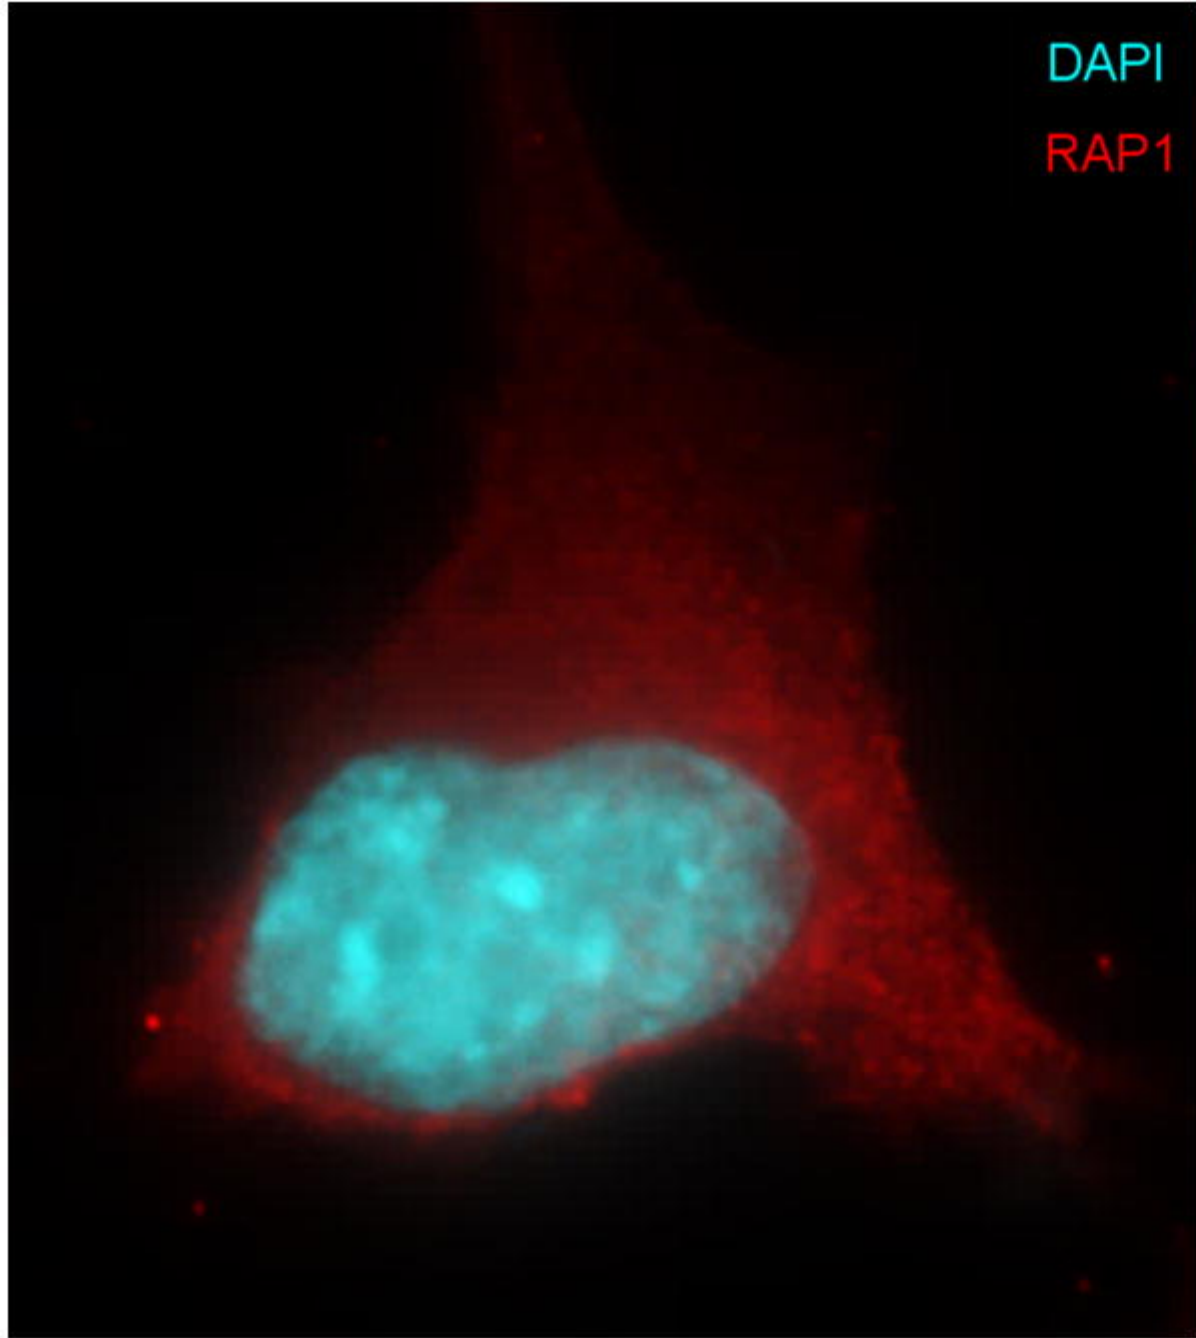

Control

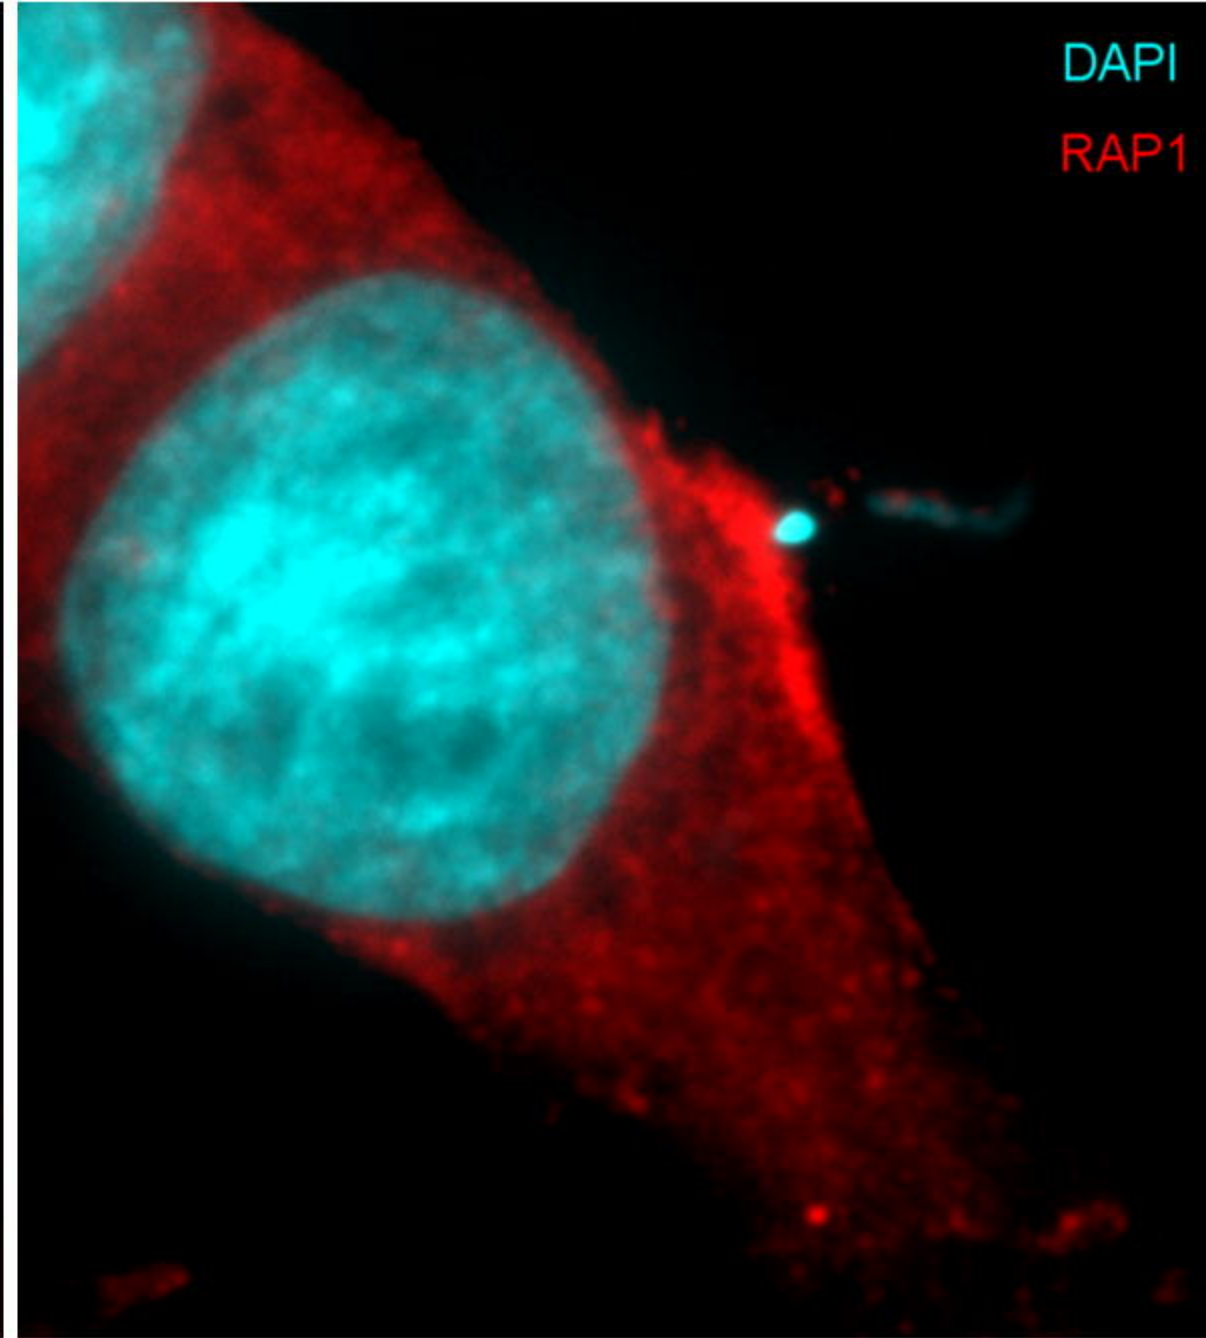

Tp Y

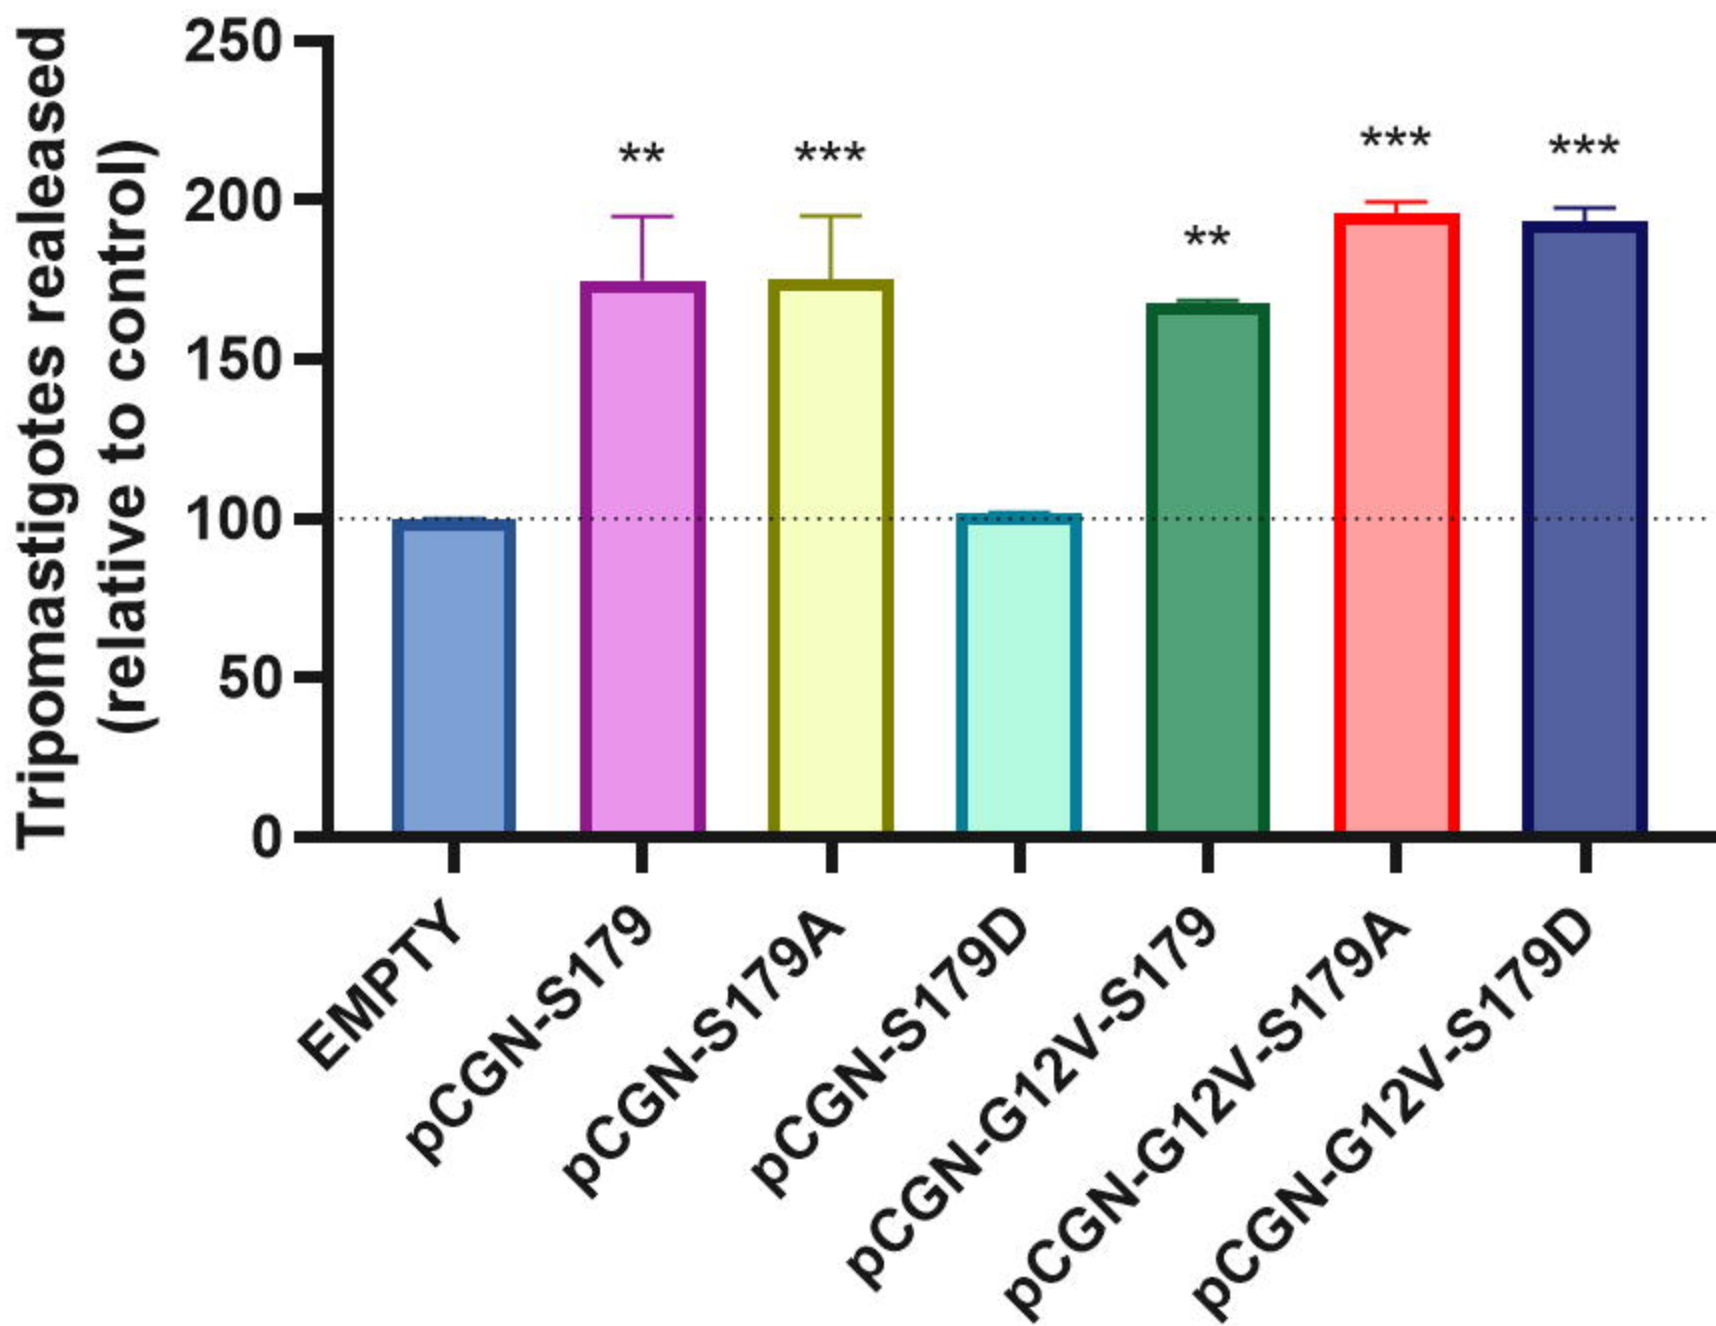

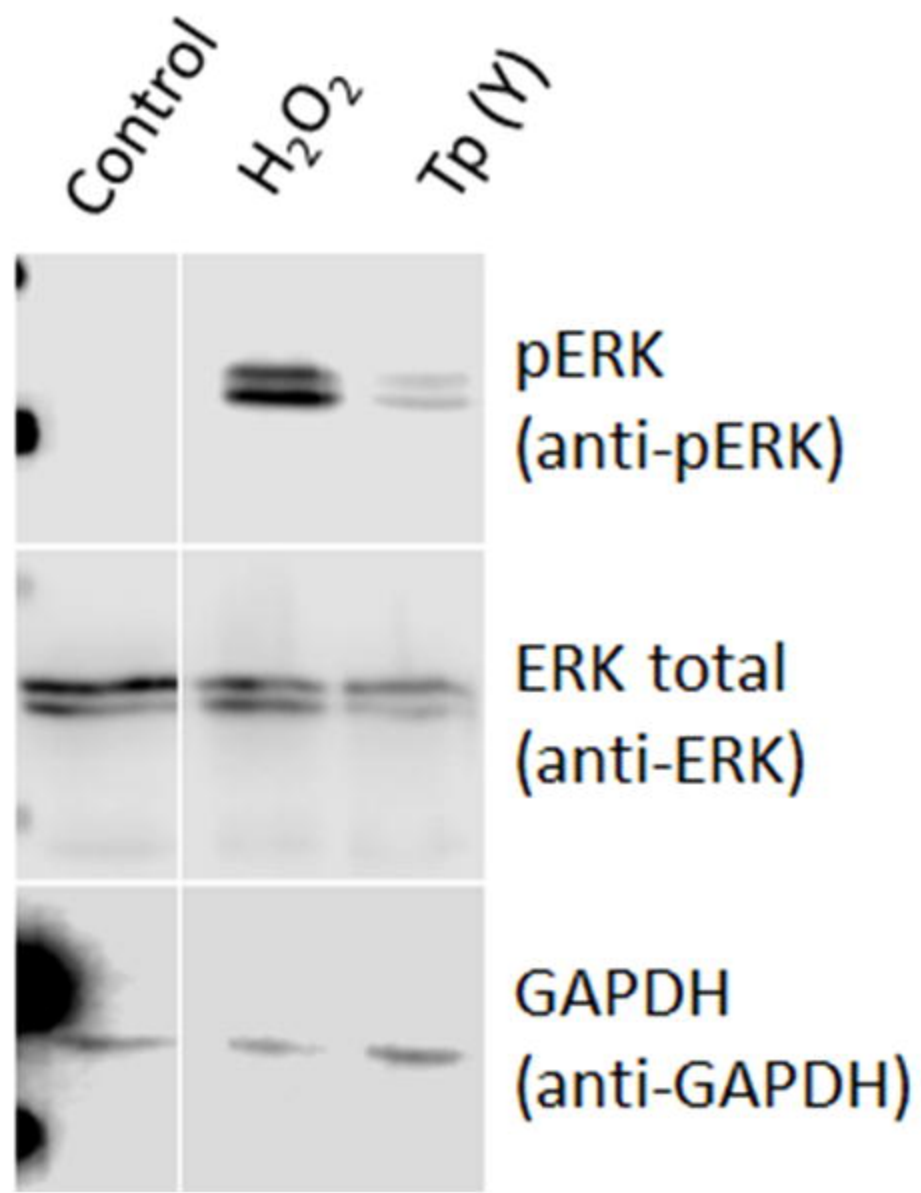

**A**

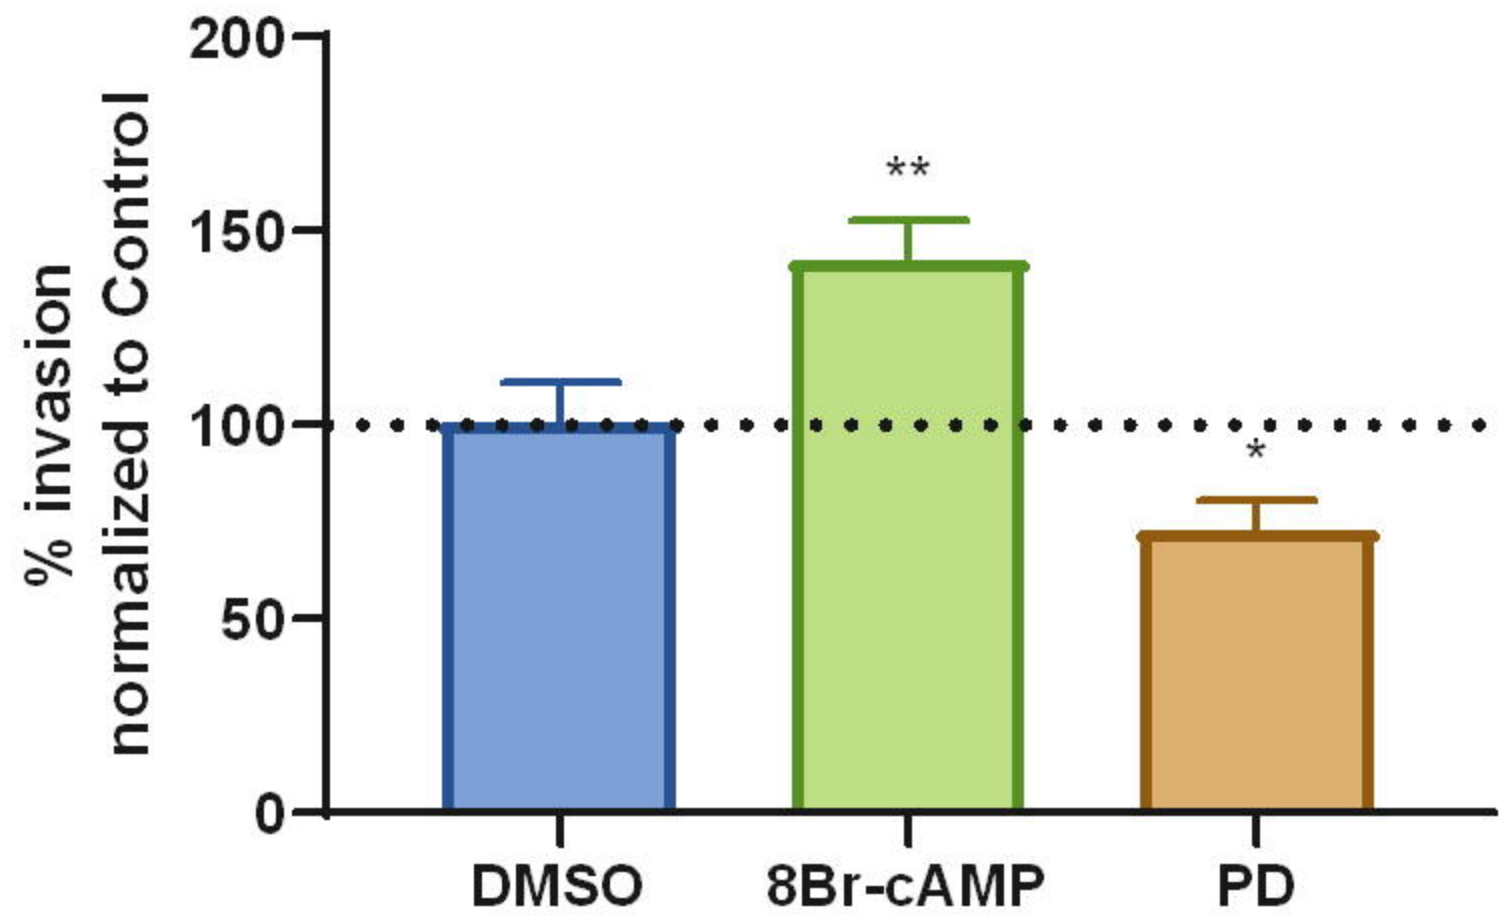

**B**

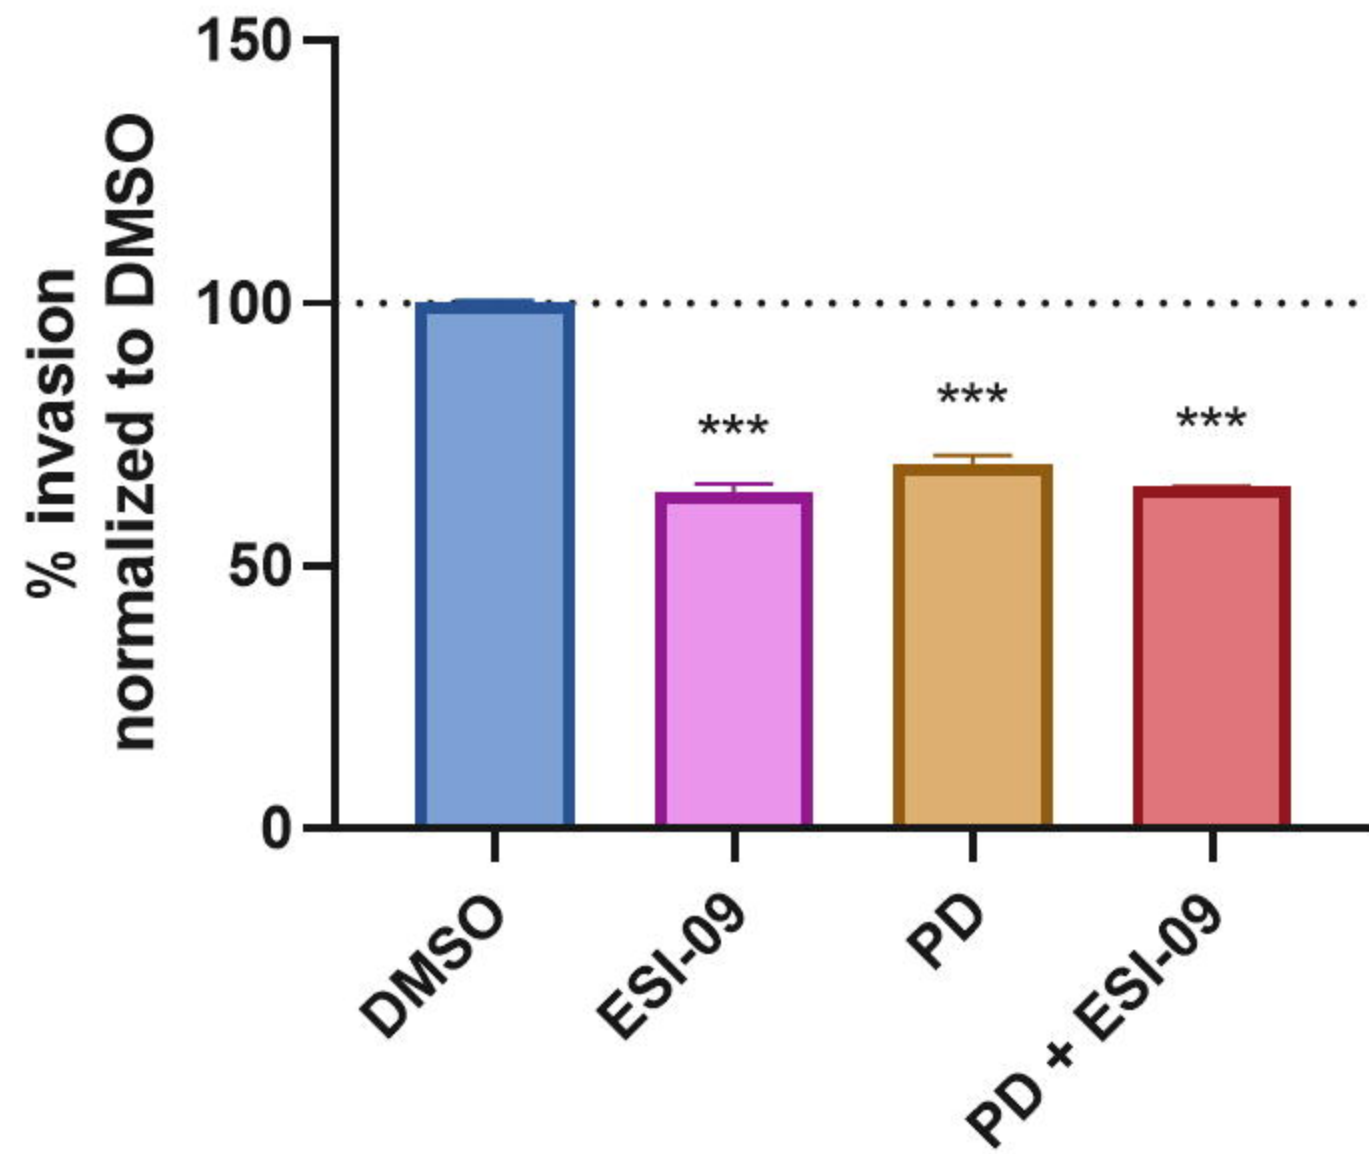

**C**
